# Supplementary material for: Health beliefs and health seeking behavior towards lymphatic filariasis morbidity management and disability prevention services in Luangwa District, Zambia: Community and provider perspectives
Source: PubMed Central journal article supplement (PMC7932505; doi:10.1371/journal.pntd.0009075), 2021-02-22

# PLOS Neglected Tropical Diseases

## Community perspectives towards morbidity management and disability prevention for lymphatic filariasis in Luangwa district, Zambia: A qualitative study.

--Manuscript Draft--

|                                                                                                                                                                                                                                                                                                                                     |                                                                                                                                                                                                                                                                                                                                                                                                                                                                                                                                                                                                                                                                                                                                                                                                                                                                                                                                                                                                                                                                                                                                                                                                                                                                                                                                                                                                                                                                                                                                                                                                                                                                                                                                                                                                                                                                                                                                                                                                                                                                                                                                                                                                                                |
|-------------------------------------------------------------------------------------------------------------------------------------------------------------------------------------------------------------------------------------------------------------------------------------------------------------------------------------|--------------------------------------------------------------------------------------------------------------------------------------------------------------------------------------------------------------------------------------------------------------------------------------------------------------------------------------------------------------------------------------------------------------------------------------------------------------------------------------------------------------------------------------------------------------------------------------------------------------------------------------------------------------------------------------------------------------------------------------------------------------------------------------------------------------------------------------------------------------------------------------------------------------------------------------------------------------------------------------------------------------------------------------------------------------------------------------------------------------------------------------------------------------------------------------------------------------------------------------------------------------------------------------------------------------------------------------------------------------------------------------------------------------------------------------------------------------------------------------------------------------------------------------------------------------------------------------------------------------------------------------------------------------------------------------------------------------------------------------------------------------------------------------------------------------------------------------------------------------------------------------------------------------------------------------------------------------------------------------------------------------------------------------------------------------------------------------------------------------------------------------------------------------------------------------------------------------------------------|
| <b>Manuscript Number:</b>                                                                                                                                                                                                                                                                                                           | PNTD-D-20-00131R1                                                                                                                                                                                                                                                                                                                                                                                                                                                                                                                                                                                                                                                                                                                                                                                                                                                                                                                                                                                                                                                                                                                                                                                                                                                                                                                                                                                                                                                                                                                                                                                                                                                                                                                                                                                                                                                                                                                                                                                                                                                                                                                                                                                                              |
| <b>Full Title:</b>                                                                                                                                                                                                                                                                                                                  | Community perspectives towards morbidity management and disability prevention for lymphatic filariasis in Luangwa district, Zambia: A qualitative study.                                                                                                                                                                                                                                                                                                                                                                                                                                                                                                                                                                                                                                                                                                                                                                                                                                                                                                                                                                                                                                                                                                                                                                                                                                                                                                                                                                                                                                                                                                                                                                                                                                                                                                                                                                                                                                                                                                                                                                                                                                                                       |
| <b>Short Title:</b>                                                                                                                                                                                                                                                                                                                 | Morbidity management and disability prevention in Zambia.                                                                                                                                                                                                                                                                                                                                                                                                                                                                                                                                                                                                                                                                                                                                                                                                                                                                                                                                                                                                                                                                                                                                                                                                                                                                                                                                                                                                                                                                                                                                                                                                                                                                                                                                                                                                                                                                                                                                                                                                                                                                                                                                                                      |
| <b>Article Type:</b>                                                                                                                                                                                                                                                                                                                | Research Article                                                                                                                                                                                                                                                                                                                                                                                                                                                                                                                                                                                                                                                                                                                                                                                                                                                                                                                                                                                                                                                                                                                                                                                                                                                                                                                                                                                                                                                                                                                                                                                                                                                                                                                                                                                                                                                                                                                                                                                                                                                                                                                                                                                                               |
| <b>Keywords:</b>                                                                                                                                                                                                                                                                                                                    | Implementation research; Lymphatic Filariasis; Morbidity management and disability prevention, Zambia                                                                                                                                                                                                                                                                                                                                                                                                                                                                                                                                                                                                                                                                                                                                                                                                                                                                                                                                                                                                                                                                                                                                                                                                                                                                                                                                                                                                                                                                                                                                                                                                                                                                                                                                                                                                                                                                                                                                                                                                                                                                                                                          |
| <b>Abstract:</b>                                                                                                                                                                                                                                                                                                                    | <p><b>Background</b><br/>Morbidity management and disability prevention (MMDP) services are essential for the management of elephantiasis, lymphoedema, and hydrocele that result from lymphatic filariasis (LF) infection. However, there is limited information on health beliefs and health seeking behaviour related to MMDP services within LF endemic regions of Zambia. This study sought to document health beliefs and health seeking behaviour for LF MMDP services among communities living in Luangwa District, Zambia.</p> <p><b>Methods</b><br/>This was an exploratory qualitative study conducted with community members including LF patients, community health workers and healthcare providers. Data was collected through a series of 4 focus group discussions stratified by sex and 26 interviews in-depth interviews. Data were analyzed by thematic analysis using NVivo software.</p> <p><b>Results</b><br/>The most commonly mentioned causes of the chronic manifestations of LF included; contact with animal faeces, using traditional herbal aphrodisiacs ( mutoto) , sexual contact with women who were menstruating or had miscarried and witchcraft. LF patients would opt to visit a traditional healer before going to the health facility. Hydrocele patients were reported to be afraid of hydrocelectomies because they thought they would become infertile or die. Very few of the community members were able to identify any home and facility-based care strategies for LF patients. Health system and cultural barriers to seeking healthcare included; long distances to the health facilities, lack of awareness of existing MMDP services, costs of accessing healthcare services, gender and social norms and fear of stigmatization.</p> <p><b>Conclusion</b><br/>This study found that health seeking behaviour among LF patients are largely driven by the causes associated with the disease. Ongoing community sensitisation and provider capacity building efforts that seek to create demand for existing morbidity management services at primary health care and household levels, as well as address patients' concerns surrounding access to care are necessary.</p> |
| <b>Additional Information:</b>                                                                                                                                                                                                                                                                                                      |                                                                                                                                                                                                                                                                                                                                                                                                                                                                                                                                                                                                                                                                                                                                                                                                                                                                                                                                                                                                                                                                                                                                                                                                                                                                                                                                                                                                                                                                                                                                                                                                                                                                                                                                                                                                                                                                                                                                                                                                                                                                                                                                                                                                                                |
| <b>Question</b>                                                                                                                                                                                                                                                                                                                     | <b>Response</b>                                                                                                                                                                                                                                                                                                                                                                                                                                                                                                                                                                                                                                                                                                                                                                                                                                                                                                                                                                                                                                                                                                                                                                                                                                                                                                                                                                                                                                                                                                                                                                                                                                                                                                                                                                                                                                                                                                                                                                                                                                                                                                                                                                                                                |
| <p><b>Financial Disclosure</b></p> <p>Enter a financial disclosure statement that describes the sources of funding for the work included in this submission. Review the <a href="#">submission guidelines</a> for detailed requirements. View published research articles from <a href="#">PLOS NTDs</a> for specific examples.</p> | <p>This study was funded by the Coalition for Operational Research on Neglected Tropical Diseases (COR-NTD),(<a href="https://www.ntdsupport.org/cor-ntd/ntd-connector/term/ntdsc">https://www.ntdsupport.org/cor-ntd/ntd-connector/term/ntdsc</a>), under Grant Number:NTD-SC #163D and was awarded to CM. The funders had no role in study design, data collection and analysis, decision to publish, or preparation of the manuscript.</p>                                                                                                                                                                                                                                                                                                                                                                                                                                                                                                                                                                                                                                                                                                                                                                                                                                                                                                                                                                                                                                                                                                                                                                                                                                                                                                                                                                                                                                                                                                                                                                                                                                                                                                                                                                                  |

This statement is required for submission and **will appear in the published article** if the submission is accepted. Please make sure it is accurate.

#### Unfunded studies

Enter: *The author(s) received no specific funding for this work.*

#### Funded studies

Enter a statement with the following details:

- Initials of the authors who received each award
- Grant numbers awarded to each author
- The full name of each funder
- URL of each funder website
- Did the sponsors or funders play any role in the study design, data collection and analysis, decision to publish, or preparation of the manuscript?
- **NO** - Include this sentence at the end of your statement: *The funders had no role in study design, data collection and analysis, decision to publish, or preparation of the manuscript.*
- **YES** - Specify the role(s) played.

\* typeset

#### Competing Interests

Use the instructions below to enter a competing interest statement for this submission. On behalf of all authors, disclose any [competing interests](#) that could be perceived to bias this work—acknowledging all financial support and any other relevant financial or non-financial competing interests.

This statement **will appear in the published article** if the submission is

The authors have declared that no competing interests exist.

accepted. Please make sure it is accurate. View published research articles from [PLOS NTDs](#) for specific examples.

#### **NO authors have competing interests**

Enter: *The authors have declared that no competing interests exist.*

#### **Authors with competing interests**

Enter competing interest details beginning with this statement:

*I have read the journal's policy and the authors of this manuscript have the following competing interests: [insert competing interests here]*

\* typeset

#### **Data Availability**

Authors are required to make all data underlying the findings described fully available, without restriction, and from the time of publication. PLOS allows rare exceptions to address legal and ethical concerns. See the [PLOS Data Policy](#) and [FAQ](#) for detailed information.

A Data Availability Statement describing where the data can be found is required at submission. Your answers to this question constitute the Data Availability Statement and **will be published in the article**, if accepted.

Yes - all data are fully available without restriction

**Important:** Stating 'data available on request from the author' is not sufficient. If your data are only available upon request, select 'No' for the first question and explain your exceptional situation in the text box.

Do the authors confirm that all data underlying the findings described in their manuscript are fully available without restriction?

**Describe where the data may be found in full sentences. If you are copying our sample text, replace any instances of XXX with the appropriate details.**

- If the data are **held or will be held in a public repository**, include URLs, accession numbers or DOIs. If this information will only be available after acceptance, indicate this by ticking the box below. For example: *All XXX files are available from the XXX database (accession number(s) XXX, XXX).*
- If the data are all contained **within the manuscript and/or Supporting Information files**, enter the following: *All relevant data are within the manuscript and its Supporting Information files.*
- If neither of these applies but you are able to provide **details of access elsewhere**, with or without limitations, please do so. For example:

*Data cannot be shared publicly because of [XXX]. Data are available from the XXX Institutional Data Access / Ethics Committee (contact via XXX) for researchers who meet the criteria for access to confidential data.*

The data underlying the results presented in the study are available from Taskforce for Global Health and will be made available through <https://www.ntdsupport.org/cor-ntd/ntd-connector/term/ntdsc> at the completion of all study activities.

*The data underlying the results presented in the study are available from (include the name of the third party and contact information or URL).*

- This text is appropriate if the data are owned by a third party and authors do not have permission to share the data.

\* typeset

Additional data availability information:

1 Community perspectives towards morbidity management and disability prevention for  
2 lymphatic filariasis in Luangwa district, Zambia: A qualitative study.

3

4 **Short title: Morbidity management and disability prevention in Zambia.**

5

6 **Authors and affiliations**

7 Patricia Maritim<sup>1\*</sup>, Adam Silumbwe<sup>2¶</sup>, Joseph Mumba Zulu<sup>1¶</sup>, George Sichone<sup>3¶</sup>, Charles  
8 Michelo<sup>4¶</sup>

9 <sup>1</sup>Department of Health Promotion and Education, School of Public Health, University of  
10 Zambia, Lusaka, Zambia.

11 <sup>2</sup>Department of Health Policy and Management, School of Public Health, University of Zambia,  
12 Lusaka, Zambia.

13 <sup>3</sup>Participatory Research and Innovations Management (PRIM), Lusaka, Zambia.

14 <sup>4</sup>Department of Epidemiology and Biostatistics, School of Public Health, University of Zambia  
15 Lusaka, Zambia.

16

17 **Corresponding Author**

18 \* Patricia Maritim: [triciamarie20@gmail.com](mailto:triciamarie20@gmail.com)

19

20 <sup>¶</sup>These authors contributed equally to this work.

21 <sup>&</sup> These authors also contributed equally to this work

22

23

24

25 **Abstract**

26 **Background**

27 Morbidity management and disability prevention (MMDP) services are essential for the  
28 management of elephantiasis, lymphoedema, and hydrocele that result from lymphatic filariasis  
29 (LF) infection. However, there is limited information on health beliefs and health seeking  
30 behaviour related to MMDP services within LF endemic regions of Zambia. This study sought to  
31 document health beliefs and health seeking behaviour for LF MMDP services among  
32 communities living in Luangwa District, Zambia.

33 **Methods**

34 This was an exploratory qualitative study conducted with community members including LF  
35 patients, community health workers and healthcare providers. Data was collected through a  
36 series of 4 focus group discussions stratified by sex and 26 ~~interviews~~ in-depth interviews. Data  
37 were analyzed by thematic analysis using NVivo software.

38 **Results**

39 The most commonly mentioned causes of the chronic manifestations of LF included; contact  
40 with animal faeces, using traditional herbal aphrodisiacs (*mutoto*), sexual contact with women  
41 who were menstruating or had miscarried and witchcraft. LF patients would opt to visit a  
42 traditional healer before going to the health facility. Hydrocele patients were reported to be afraid  
43 of hydrocelectomies because they thought they would become infertile or die. Very few of the  
44 community members were able to identify any home and facility-based care strategies for LF  
45 patients. Health system and cultural barriers to seeking healthcare included; long distances to  
46 the health facilities, lack of awareness of existing MMDP services, costs of accessing healthcare  
47 services, gender and social norms and fear of stigmatization.

48 **Conclusion**

49 This study found that health seeking behaviour among LF patients are largely driven by the  
50 causes associated with the disease. Ongoing community sensitisation and provider capacity  
51 building efforts that seek to create demand for existing morbidity management services at  
52 primary health care and household levels, as well as address patients' concerns surrounding access  
53 to care are necessary.

54

55 **Key words:** Lymphatic filariasis, morbidity management, Zambia,

56

57

## 58 **Author Summary**

59 Lymphatic filariasis (LF) infection if untreated results in fluid accumulation in the limbs or  
60 breasts (lymphoedema) or genitalia (hydrocele) that is painful and causes great discomfort.  
61 Morbidity management and disability prevention (MMDP) strategies such as surgery for  
62 hydrocele, treatment of acute attacks and management of lymphoedema are necessary for the  
63 management of the advanced stages of LF. However, very few countries including Zambia, have  
64 adequate information on the health beliefs and health seeking behaviour of communities living  
65 in endemic areas. This study sought to explore community perspectives to morbidity  
66 management and disability prevention for LF in a highly endemic region, Luangwa District,  
67 Zambia between February and April 2019. Some of the common causes of lymphoedema and  
68 hydrocele mentioned were; contact with animal faeces, using traditional herbal aphrodisiacs  
69 (*mutoto*), sexual contact with women who were menstruating or had miscarried and witchcraft.  
70 There was limited knowledge of home-based and facility-based care strategies for LF patients.  
71 Nevertheless, patients would often go to health facilities after visiting traditional healers and  
72 observing no improvement. Barriers to accessing healthcare included; long distances to the  
73 health facilities, lack of awareness of existing MMDP services, costs of accessing healthcare  
74 services, gender and social norms and fear of stigmatization.

75

76

77

78

79

80

81

82

83

84



## 85 **Background**

86 Lymphatic filariasis (LF), a neglected tropical disease, causes permanent disability through  
87 chronic manifestations of lymphoedema and hydrocele accounting for 1.36 million disability  
88 adjusted life years [1]. Globally more than 890 million people living in 72 endemic countries face  
89 the risk of infection and an estimated 40 million have chronic manifestations of the disease [2].  
90 Disease control programmes have mostly targeted the interruption of LF transmission through  
91 mass drug administration (MDA) whilst placing less emphasis on promoting morbidity  
92 management and disability prevention services (MMDP) for those presenting with chronic  
93 manifestations. The basic care package for MMDP services includes individual treatment for  
94 episodes of adenolymphangitis (acute attacks), destruction of microfilaria, management of  
95 lymphoedema to prevent disease progression, and surgery for hydrocele [3]. Since 2000, MDA  
96 programmes for LF programs have delivered 7.7 billion cumulative treatments to people living  
97 in endemic areas [2], whilst fewer lymphoedema and hydrocele patients have accessed MMDP  
98 services in the same period.

99 According to the World Health Organization (WHO), MMDP services should be included in  
100 the basic primary healthcare package [4-7]. However, progress towards establishing and  
101 streamlining MMDP services still remains considerably slow, particularly in the Africa region,  
102 which accounts for a considerable proportion of the LF burden [2]. This is evident in the number  
103 of countries that have put in place reporting mechanisms for patients with lymphoedema and  
104 hydrocele. For instance out of 34 LF endemic countries in the WHO Africa region, only 22 are  
105 reporting on lymphoedema patients and 23 on hydrocele patients [2]. Global efforts to eliminate  
106 LF through MDA are likely to scale down beyond 2020, and strategic direction of diseases control  
107 efforts will most likely pivot towards the provision of MMDP services.

108 In Zambia, LF is a public health concern as 87 of 118 districts are considered endemic with the  
109 prevalence of the circulating filarial antigen above 1.5% [2,8]. MDA for LF was first piloted in  
110 Western Province in 2014, and then scaled up nationally in 2015 with annual rounds running  
111 until 2018. In 2018, national coverage for MDA was reported at 90.8 % [2]. Morbidity mapping  
112 of LF patients has been conducted concurrently with the MDA rounds. Results from the LF  
113 mapping exercise have shown that there are many cases of hydrocele and lymphedema spread  
114 across all ten provinces in the country. However, there is limited information of what MMDP  
115 services are available, where and how LF patients are accessing them. Furthermore, LF patients'

116 health beliefs and health seeking behaviour towards MMDP services remain largely  
117 undocumented in Zambia.

118 The Zambia Elimination of Neglected Tropical Diseases National Masterplan (2019-2023) places  
119 huge emphasis delivery of MMDP services in endemic districts. However, Zambia currently lacks  
120 a comprehensive national MMDP strategy for LF or suitable indicators to monitor the provision  
121 of MMDP services [8]. As part of efforts to generate evidence to guide the MMDP strategy  
122 formulation, the Ministry of Health in collaboration with the University of Zambia, School of  
123 Public Health developed a pilot programme using implementation research approaches to  
124 identify the most appropriate mechanisms through which MMDP services can be streamlined  
125 and integrated into local primary health care systems in Luangwa District to inform potential  
126 scale up. This study presents the findings of a preliminary baseline assessment conducted prior  
127 to the development and implementation of the pilot programme to understand LF patients'  
128 health beliefs and health seeking behaviours towards MMDP services in Zambia. Specifically, this  
129 paper reports on the perspectives of health providers, local leaders, community members and  
130 patients on their knowledge of LF morbidity, morbidity management practices, health seeking  
131 behaviors, and factors affecting access to MMDP services in Luangwa District.

132

## 133 **Methods**

### 134 **Study design**

135 An exploratory qualitative research was undertaken as part of a larger baseline formative  
136 assessment to inform the development and implementation of an integrated health system  
137 intervention to improve access of MMDP services for LF patients in the district. Due to paucity  
138 of information within the Zambian context on MDDP, an exploratory qualitative research design  
139 was felt to be most appropriate to fully explore community perspectives and common  
140 management practices of the most common LF chronic manifestations in the district. The study  
141 was conducted between February and April 2019.

### 142 **Study setting**

143 Luangwa District which is found along the Luangwa River valley in Lusaka Province, has one of  
144 the highest prevalence of Circulating Filarial Antigen in Zambia [9]. The district is predominantly  
145 rural with an estimated population of 31,665 whose main income generating activities are fishing  
146 and farming. The Ministry of Health (MoH) through the local District Health Office is

147 responsible for primary health care in the district as in other parts of the country. The local  
148 population is served by 14 Rural Health Centers and 2 second level Hospitals.

#### 149 **Health systems context**

150 Mass Drug Administration activities which begun in 2015 have predominately been the main  
151 recognized health system intervention against LF at district level. While MMDP services are  
152 considered as part of the primary health care, local health systems face numerous challenges in  
153 their delivery. Very few rural health centers are suitably equipped to provide basic MMDP  
154 package of services. Available primary health services are general in nature without specific stand-  
155 alone activities for chronic manifestations of LF such as hydrocele and lymphedema. A limited  
156 number of health facilities in the area have adequate resources to conduct hydrocelectomies as  
157 well as provide lymphoedema management services. In the case of lymphoedema, the most  
158 readily available services are pain relief and general health education with IEC materials on  
159 display in busy outpatient areas. The health facilities also provide antibiotics to prevent secondary  
160 infections as a result of acute attacks as well as lymphatic draining to reduce fluid density.  
161 Furthermore, there are existing referral systems is in place, where complicated hydrocele cases  
162 are referred to the two hospitals; Katondwe Mission Hospital and Luangwa Boma Hospitals  
163 which are equipped to perform hydrocelectomies. Severe cases are referred to the University  
164 Teaching Hospital in Lusaka District. Despite surgical interventions being available at health  
165 facilities, utilisation has also been reported to be very low. In addition, local healthcare providers  
166 and community health workers responsible for conducting case identification and management  
167 have limited training on provision of MMDP services.

#### 168 **Participant recruitment**

169 In order to select the most appropriate health facility catchment areas from which data would be  
170 collected, the study team conducted a morbidity mapping exercise as available records from the  
171 Ministry of Health were not up to date. This mapping exercise consisted a census of patients  
172 with the chronic manifestations of LF conducted by Community health workers (CHWs) who  
173 are usually engaged by the health facilities in drug distribution during MDA for F campaigns.  
174 The CHWs received training on LF case identification and went from household to household  
175 recording all patients who exhibited signs of elephantiasis, lymphoedema and hydrocele. There  
176 was a total of 237 cases identified during the mapping exercise in the district; 27 lymphedemas,  
177 199 hydroceles and 7 with both hydrocele and lymphedema. Based on the census, eight health  
178 facility catchment areas which had the highest number of LF patients were selected as study sites.

179 These were Luangwa Boma, Mpukha, Katondwe, Kanemela, Chitope, Kasinsa, Mandombe  
180 clinics and Luangwa District Hospital. Whilst this study focuses on the formative exploratory  
181 qualitative research, the results of the baseline census of LF patients are published elsewhere.

## 182 **Data collection**

183 Data was collected through a series of focus group discussions (FGDs) and in-depth interviews  
184 (IDIs). Interview and FGD guides contained questions on the causes and manifestations of the  
185 disease, cultural beliefs, disease management practices, health seeking behavior as well as factors  
186 that affect how patients access to healthcare (Finalized tools provided as S1 Appendix). Prior to  
187 data collection, the guides/tools were piloted to ensure their suitability by adapting questions  
188 where necessary. All FGDs and interviews were audio recorded with the consent of the study  
189 participants. In addition, field notes were taken during the course of the interviews. Data  
190 collection was done in English and Nyanja to ensure that all participants were able to articulate  
191 their perspectives as comprehensively as possible. The recordings were transcribed verbatim and  
192 those done in Nyanja were translated to English.

## 193 *Focus group discussions*

194 There were 4 mixed focus group discussions (2 male and 2 female) held with community  
195 members and LF patients in two health facility catchment areas; Luangwa Boma and Mphuka,  
196 which had reported the highest number of cases in the district after the morbidity mapping  
197 exercise. The participants were conveniently sampled from the communities living in the selected  
198 catchment areas. Recruitment was done by the CHWs and health care providers attached to the  
199 two health facilities. Participants were invited to take part in the study via telephone by the **health**  
200 **facility in-charges**. On average each focus group was comprised nine participants aged between  
201 18-50. The focus groups were differentiated by gender due to prevailing cultural beliefs in the  
202 district surrounding the ease with which community members could talk about hydrocele which  
203 is considered a sensitive topic of discussion. Such a separation encouraged community members  
204 to freely express themselves. The FGDs were conducted at the health facility but away from  
205 patient areas to ensure the privacy of the participants and avoid interruptions. The FGDs lasted  
206 between 1 hour 30 minutes to 2 hours.

## 207 *In-depth Interviews*

208 A total of twenty-six interviews were also conducted with district neglected tropical disease focal  
209 point persons (n=2), community health workers (n=8), health facility staff (n=8) and traditional  
210 leaders (n=8). Participants were purposively sampled based on their involvement in the

211 implementation of LF elimination programmes in the area and were drawn from the 8 health  
 212 facility catchment areas that had the highest number of LF patients. The interviews with the  
 213 community leaders were centered around exploring community perspectives of the disease,  
 214 availability and accessibility of services, stigma and social support structures in their respective  
 215 communities. Whereas the interviews that were targeted towards the health facility staff, district  
 216 health officials and CHWs focused on their training to provide MMDP services, knowledge of  
 217 different management services and factors shaping their ability to effectively provide these  
 218 services. **Participants invited** to take part either through telephone calls or face to face. Interviews  
 219 were conducted at the respective health facilities and the Luangwa district Health Offices.  
 220 Interviews lasted between 45 minutes to an hour.

### 221 **Data analysis**

222 A thematic analysis approach was used to analyze the data. In order to determine the different  
 223 barriers that affect how community members including LF patients access appropriate care, a  
 224 **framework analysis approach was** [10]. The study team utilized Levesque et al's conceptual  
 225 framework on patient centered access to health care which has been extensively used in other  
 226 studies [7,11,12]. The framework defines access as the “opportunity to reach and obtain  
 227 appropriate health care services in situations of perceived need for care.” It proposes that from a  
 228 health care provider perspective, access to care can be categorized into five dimensions;  
 229 approachability, acceptability, availability and accommodation, affordability and  
 230 appropriateness. Barriers can impact these dimensions which in turn affects an individual's  
 231 ability to utilize health services. By affecting their ability to perceive, ability to seek, ability to  
 232 reach, ability to pay and ability to engage with the available health services [1]. These demand  
 233 and supply side dimensions formed the coding tree from which predetermined themes and sub  
 234 themes were extracted using both inductive and deductive methods to ensure that existing and  
 235 emergent themes were exhaustively identified. Preliminary coding of the transcripts was done by  
 236 PM and AS. JZ reviewed the coding lists to ensure that identified codes were aligned to the  
 237 the framework. Subsequently PM, AS and JZ jointly reviewed the codes and developed the final  
 238 codebook as shown in Table 1.

239 Table 1. Summary of qualitative coding tree.

| Broader theme                                 | Sub theme                                |
|-----------------------------------------------|------------------------------------------|
| Health beliefs about the chronic stages of LF | Presence of local disease terminologies. |
|                                               | Causes of infection                      |

|                                                   |                                                                     |
|---------------------------------------------------|---------------------------------------------------------------------|
|                                                   | Signs and symptoms of the lymphoedema, hydrocele and acute attacks. |
| Health seeking behaviour                          | Consulting traditional healers                                      |
|                                                   | Visits to the health facility                                       |
|                                                   | Knowledge of disease management strategies                          |
| Availability and accommodation of health services | Long distances to health facilities                                 |
| Approachability of health services                | Lack of awareness of existing MMDP services                         |
| Acceptability of health services                  | Gender norms                                                        |
|                                                   | Social Norms                                                        |
|                                                   | Stigmatization                                                      |
| Affordability of health services                  | Costs of accessing healthcare services                              |

240

241 After completion of the data analysis, a stakeholder meeting was held to validate the findings of  
 242 the study and to confirm that the information captured from the participants was accurately  
 243 reported. A total of fifty participants took part in the validation meeting including Local Chiefs,  
 244 traditional leaders, Ministry of Health staff and CHWs. The validation meeting provided an  
 245 opportunity for further interrogation and alignment of the study findings. More so, it provided  
 246 a platform to clarify participant perspectives on some of the findings.

### 247 **Ethical Considerations**

248 Ethical approval was sought from University of Zambia Biomedical Research Ethics Committee  
 249 (REF.017-11-18) and the National Health Research Authority under the Ministry of Health,  
 250 Zambia. All participants were informed of the purpose of the assessment, details of study  
 251 procedures including freedom to withdraw, potential benefits and risks, prior to the  
 252 commencement of data collection. Thereafter written informed consent was obtained as all  
 253 participants were 18 years and above.

254

### 255 **Results**

256 The study results are presented according to the views of various categories of participants;  
 257 community members, patients, healthcare providers, community health workers and traditional  
 258 leaders. Verbatim quotes are also presented to provide context on the participant perspectives.  
 259 Most of the views on key thematic areas were similar among the different category of participants.

260

261 **Health beliefs of lymphoedema, hydrocele and elephantiasis.**

262 During the focus group discussions, participants pointed out the local Nyanja names associated  
263 with the symptoms of the different manifestations of LF; *tumbu* or *nchofu* for hydrocele and  
264 *musakasa* for all forms lymphoedema. The signs and symptoms of the different manifestations of  
265 LF chronic conditions were well known by the community members who were able to describe  
266 them during the FGDs.

267 “This disease of lymphoedema, I used to see people swelling the testicles, legs and to my side  
268 at first, I took it to be normal like that’s how they were born. All the years I took it like that.”

269 (FGD1, Community member)

270 The most common mentioned causes of LF included eating food that had not been warmed  
271 properly, contact with animal faeces, using traditional medicine such as local herbal aphrodisiacs  
272 (*mutoto*), sexual contact with women who were menstruating or who’ve had a miscarriage,  
273 witchcraft, men using pounding sticks after they have been used by women, sitting on chairs  
274 which LF patients have used, sitting on stones that women use during food preparation and  
275 children vomiting on their mothers during breastfeeding. In addition, there was a belief that the  
276 diseases were hereditary. Only a handful of the FGD participants were able to correctly identify  
277 mosquitoes as the disease-causing vectors and could be prevented by taking medication.

278 “Sleeping with a lady who was pregnant and whose baby dies and they are found in clubs or  
279 bars without you knowing anything, you approach her and when she accepts to have sex with  
280 her, you end up getting the disease from her.” (FGD2, Community member)

281

282 “I didn’t know anything I could only see a woman her breast gets swollen, it could be a leg  
283 and hand. I thought it was a different disease. I didn’t know that the mosquito brings the  
284 disease.” (FGD1, Community member)

285 Community actors such as traditional leaders reiterated some of the beliefs that came up during  
286 the FGDs. For instance, one of the chiefs stated that;

287 “..... Here we believe that if you are passing where there are faeces of animals especially  
288 this rain season whether bush animals or village animals and it can be goats, cattle, sheep,  
289 pigs, elephants or other animals the disease goes inside the nails making your legs swollen  
290 so even if you treat hydrocele it can’t be healed and that person will die at that old age  
291 with swollen legs like that....” [IDI5, Traditional Leader].

292 Nevertheless, knowledge of the causes of LF among community actors such as traditional leaders,  
293 community-based volunteers and healthcare providers differed greatly depending on their level  
294 of involvement in LF disease control activities such as MDA. Most of them acknowledged that  
295 they had limited knowledge of how to manage the disease. Healthcare providers who came into  
296 regular contact with patients coming to the facility or through community case identification  
297 exercises were better at identifying signs and symptoms of lymphoedema, elephantiasis and  
298 hydrocele. One health provider indicated;

299 “...Even the skin changes and it looks like it doesn’t not look to be a normal skin. It  
300 changes the color and it becomes hard. For lymphoedema even the limbs, arms legs differ  
301 to a normal one. They become different in size...[IDI2, Health provider].”

### 302 **Healthcare seeking behaviour**

303 It was apparent from the FGDs and interviews that, patients’ decision to seek care from both  
304 traditional healers and from the health facility was linked to the prevailing ideas about the causes  
305 of the disease. Due to the communal belief that LF is hereditary, patients who had seen their  
306 family members exhibiting symptoms and not seeking appropriate care did not see the need to  
307 go to a health facility. Moreover, community members who viewed it as a disease that arose due  
308 to witchcraft rather than mosquitoes were more likely to seek help from traditional healers. There  
309 was also a common belief that the remedies provided by the traditional healers were more  
310 effective and permanent solutions in comparison to what was provided at the health facilities.  
311 One of the participants who had lymphoedema pointed out;

312 “I have had three years with this disease and here at this clinic they just give me Panadol  
313 when I come so I stopped coming because Panadol doesn’t work.” (FGD 2, Community  
314 member)

315 The study participants indicated that some lymphoedema patients would first go to a traditional  
316 healers and only go to a health facility once their symptoms became more severe. This was  
317 because the tattoos and herbs administered by the traditional healers would exacerbate the acute  
318 attacks due to LF forcing the patients to go to the health facility for specialised treatment.

319 “With traditional beliefs you will think let me go and look for traditional medicine and  
320 put traditional tattoos. Now when they put tattoos instead of the legs healing they start  
321 swelling because traditional tattoos now start bringing sores because people are different,  
322 some of them it just starts swelling without any pain and then you go to see some with  
323 doctors or to the clinic.” [IDI1, Community Health Worker].



324 Very few of the community members were able to identify any homebased care strategies that  
325 could prevent the progression of lymphoedema and reduce the occurrence of acute attacks. In  
326 the case of hydrocele, it was rare for patients to go to health facility to seek interventions such as  
327 aspiration of fluid or hydrocelectomies because they were afraid of being rendered infertile, fear  
328 of undergoing a surgical procedure or that the surgery would leave them in wheelchairs that  
329 made it difficult for them to undertake their regular duties. Some participants narrated that they  
330 thought the surgical procedure was actually meant to remove the testicles.

331 “Some people are scared to go for operation to say they will be operated, they think when  
332 they do they can be gone for good and secondly they say when you are operated you will not  
333 have children anymore as a result people go for traditional medicine.” (FGD3, Community  
334 member)

335 The patients reported that they were afraid to go the health facility because they felt that their  
336 conditions had become so advanced that any treatment they received would not lead to an  
337 improvement of their symptoms. Healthcare providers and CHWs pointed out that as a result  
338 of this, it was common, for hydrocele patients to come into the health facility with very huge  
339 swellings. The loss of hope hampered patient motivation to maintain home based care practices  
340 which are critical to ensuring that lymphoedema does not progress to elephantiasis, and that  
341 surgical interventions are undertaken early for hydrocele.

342 “Say even if am to go to the clinic I won’t be healed am already disabled or paralyzed so even  
343 if am to go to the clinic I won’t be helped, others regardless of the condition being severe,  
344 they would remain home and say am disabled already.” [IDI3, Community Health Worker].

## 345 **Health system and cultural barriers to seeking healthcare**

### 346 **Distance to health facility**

347 Luangwa District is very remote and a portion of the district is covered by the Luangwa National  
348 Park. As a result, some communities in the district have to travel long distances of up to 20  
349 kilometers and more to the nearest health facility and their access may be inhibited by wildlife  
350 attacks such as elephants from the Luangwa National Park. In addition, roads to the health  
351 facilities are sometimes impassable and the most common means of transport is bicycles which  
352 are inappropriate to transport lymphoedema and hydrocele patients. As such some patients  
353 choose to stay home rather than go to the health facility. The district also borders Mozambique  
354 and Zimbabwe and patients who may be involved in economic activities which require them to

355 travel across the borders are often missed out when healthcare providers conduct outreach and  
356 follow up visits at community level to provide MMDP services as they may not be found at their  
357 homes.

358 “Some villages are quite on remote areas. Hence depending on the transportation they  
359 may not be able to come from here and also some they come from across our neighboring  
360 country across the river in Mozambique.” [IDI3, Healthcare Provider].

### 361 **Lack of awareness of existing MMDP services**

362 A recurring theme across the focus group discussions and interviews is that most community  
363 members are not aware that there are MMDP services available at the health facilities or that  
364 there are home based care strategies that lymphoedema patients can use to prevent the worsening  
365 of their conditions. They indicated that the information that was provided to them by the  
366 **Community Health Workers** was mostly focused on the importance of taking part in annual  
367 drug distribution exercises during MDA for LF campaigns. Furthermore, other ongoing  
368 community sensitisation exercises tended to focus on diseases such as malaria, HIV/AIDS and  
369 maternal, newborn and child related conditions, as LF is not perceived to be a public health  
370 priority. Nevertheless, the study participants reported that the healthcare providers and CHWs  
371 had now begun conducting community outreach and health talks with the help of LF patients  
372 who would act as champions to encourage more community members to utilize MMDP services.

373 “What makes these people to come to the clinic, maybe a fellow patient went to the clinic  
374 and was assisted then the information is spread to fellows. Then we encourage them that you  
375 find you have the right to share with friends that I was helped in this way so that those who  
376 are shy can be motivated and go to the clinic openly and express their problems.” [IDI3,  
377 Community Health Worker].

### 378 **Costs of accessing healthcare services**

379 Majority of the residents in the district are poor and rely on subsistence farming and fishing for  
380 sustenance. As such, when deciding on how best to prioritize available resources, they opted to  
381 use the minimal resources they had for food and basic necessities before considering spending  
382 on health care, particularly for conditions that they thought were incurable. For this reason,  
383 some patients may fear going to the health facility to access MMDP services due to the cost they  
384 may have to incur to not only access, but also getting to the health facility considering their  
385 disability.

386 “Yes, some they think that way. That they will pay for the operation, they think that if doctors  
387 refer me to the theatre where am I going to get the money so it’s better I just stay with my  
388 swollen legs.” [IDI5, Traditional Leader].

389 Despite services at health facilities being free, there is a perception among community members  
390 that they are expected to pay fees for treatment services such as hydrocelectomies which dissuades  
391 them from seeking care. Furthermore, the opportunity cost associated with taking time off to go  
392 to a health facility is not considered preferable. In the event that a patient is found to have a  
393 severe case of hydrocele or lymphoedema requiring specialized treatment at one of the three  
394 referral facilities, the associated costs such as hiring transportation and out of pocket hospital  
395 expenses act as barriers to accessing care. Families that have LF patients are sometimes forced to  
396 save money over long periods of time to enable them to access care.

397 “So, for them they think, if I start going there with my cost of living, it is difficult to find  
398 money, so when they think I start going to the hospital and maybe there are also some  
399 payments at the hospital, no its better I just don’t go.” [IDI1, Community Health Worker].

#### 400 **Gender and Social norms**

401 According to the health care providers, male hydrocele patients are less likely to come to the  
402 facility and speak freely about their condition. The participants indicated that one of the most  
403 common prevailing cultural belief was that conditions to do with genitalia should not be  
404 discussed openly or even shown to members of the opposite sex. As such hydrocele patients are  
405 embarrassed to access services and even if they do, they do not easily open up especially if they  
406 are being attended to by female health care providers.

407 “People are not open to explain the problem they have especially if a woman is interviewing  
408 a man it becomes a big challenge. Others are known that he has such a problem but talking  
409 to him, he refuses completely.” [IDI2, Community Health Worker].

410 Nonetheless, having hydrocele was viewed as a marker of high social standing, and men who  
411 have it are more likely to be chosen as headmen as they are perceived to be old and wise. This  
412 has acted as a deterrent to patients seeking care.

413 “... When they get sick they don’t even go to the hospital because they are respected so  
414 much. Yes, they respect him a lot even if you reach somewhere he will be the first one to be  
415 given the chair just because of what they are seeing, respecting him a lot that one who doesn’t  
416 have, so mostly if you become a headman they believe you are supposed to have hydrocele

417 and you should become the head of the family you are supposed to have that so that even if  
418 you this is our leader.....”[KII2, Traditional Leader].

#### 419 **Fear of stigmatisation**

420 Fear of stigmatisation also inhibits patients’ ability to seek care. During regular case identification  
421 exercises by healthcare providers, known hydrocele patients, who are approached for referral to  
422 the health facility would either deny having the condition or request to talk to them in private  
423 because they are afraid that they would be laughed at if other community members found out  
424 that they had hydrocele.

425 “Especially if he has hydrocele they start laughing at him so you will find sometimes he  
426 can’t even be open and be free to go to the hospital because of the fear that people will  
427 laugh at me.” [KII2, Traditional Leader].

428 “They tell you we can talk in a hidden place or maybe you just come later, because there  
429 are people present.” [IDI1, Community Health Worker].

430

#### 431 **Discussion**

432 Lymphatic filariasis infection if left untreated results in lymphoedema, elephantiasis and  
433 hydrocele which are not only debilitating but without care may result in permanent disability.  
434 MMDP services provide an opportunity through which patients could have access to  
435 management strategies that ensure their conditions do not progress to more advanced stages  
436 allowing them to be fully involved in community activities and undertake personal daily tasks.  
437 Various studies have been conducted in Luangwa district exploring the prevalence of the disease  
438 [9] and how community engagement strategies are able to shape participation in Mass drug  
439 administration campaigns [13], however there have been no studies exploring how the socio-  
440 cultural context of the area shapes morbidity management practices at health system and  
441 community levels. As such this study sought to explore health beliefs and the health seeking  
442 behaviour among communities living in the area in order to inform the development of a MMDP  
443 programme that would be implemented in the district.

444 Local communities in Luangwa district were found to believe that some of the causes of hydrocele  
445 and lymphoedema included witchcraft, direct contact with infected individuals or objects they  
446 have used as well it being a heritable disease which matches to results from similar studies in  
447 other LF endemic countries [14-16]. Moreover, the poor understanding of the connection

448 between mosquitoes as the cause of filarial infection and the more advanced stages of disease has  
449 also been shown elsewhere [14,17,18]. Although a few of the community members were able to  
450 correctly identify mosquitoes as the disease-causing vectors and could list some preventive  
451 measures such as taking part in mass drug distribution exercises, knowledge of morbidity  
452 management practices was very minimal.

453 As is the case with other low resource settings, community health workers who come into contact  
454 with communities are often the main source of information on diseases and management  
455 strategies[17]. In the absence of a national MMDP strategy for LF in Zambia which ought to  
456 provide guidance on training of CHWs, the inclusion of key health messages related to morbidity  
457 management during community sensitization exercises is a missed opportunity. Largely because  
458 most of the information that they provide during community mobilization exercises is limited to  
459 creating awareness on MDA and the importance of participation in annual rounds.

460 Despite seeking care from healthcare providers and traditional healers, our study found that  
461 traditional healers are still the preferred first line of care for most LF patient living in the  
462 community as has been reported elsewhere [14,17,19,20]. Most patients only go to the health  
463 facility once their pain has become too severe and their symptoms have progressed. This has a  
464 negative bearing on their treatment outcomes. The inclusion of traditional healers in the delivery  
465 of morbidity management programmes is an opportunity that can be explored especially given  
466 that some of them were found to be LF patients themselves and as such can act as champions.  
467 We also found that patient motivation amongst lymphoedema patients often wanes once they  
468 realize that their conditions can only be managed over time and are not completely curable. As  
469 has been the case in other studies [15,17,20,21]. There were low uptake levels for surgical  
470 interventions for hydrocele patients due to fear of the surgery itself, fear of sterility and  
471 anticipated costs of surgery. Similar to other studies exploring health seeking behaviour, factors  
472 that were found have the most significant effect on accessing MMDP services included cost, lack  
473 of awareness of existing services, gender and social norms and stigma [17,19,22,23].

474 Morbidity management and disability prevention services remain a critical component of the  
475 global strategy to address the lymphatic filariasis burden in most low-income settings. Whilst  
476 most efforts have predominately been centered around MDA for LF, MMDP services provide a  
477 platform to complement these efforts. Studies have documented that creating demand for  
478 MMDP services has also had a positive impact on community acceptability of MDA for LF [24].  
479 Morbidity management programmes for lymphedema and hydrocele have been reported to

480 increase community support for and hence participation in MDA for LF [25]. These programmes  
481 provide training on self-management of lymphedema for patients and hydrocele surgical  
482 operation for the healthcare providers. Community knowledge of available care, including  
483 surgery for hydrocele patients motivated people to participate in MDA for LF. Lymphedema  
484 management programmes also provided patients with a platform to share information with other  
485 community members about the disease and the benefits of the drugs [26].

#### 486 **Strengths and limitations of the study**

487 This was an exploratory qualitative study that sought to gather data on one of a most neglected,  
488 but prevalent public health problem in Zambia. Data were gathered from a varied category of  
489 participants with regards to community experiences of LF patients access to healthcare, which  
490 enabled for richer understanding and perspective of the topic. Furthermore, the study research  
491 team engaged actors from both health systems, community and household level to provide  
492 information on some of the underlying issues and multitude of factors at different levels affecting  
493 access to MMDP services in Zambia. However, only a small fraction of patients were interviewed  
494 as most of their data was captured using a close ended survey that is reported elsewhere. But even  
495 with this limitation, the patients as well as other category of participants were able to provide the  
496 required information. Another limitation is that sample of Luangwa District may not represent  
497 views of other LF endemic areas in Zambia, but still provides a critical learning point in efforts  
498 to create national strategy for MMDP services.

#### 499 **Conclusion**

500 This study found that hydrocele and lymphoedema are well known among communities living  
501 in Luangwa District. Moreover, the health seeking behaviour among LF patients living in the  
502 communities is largely driven by the causes associated with the disease. Ongoing community  
503 sensitisation that highlights the linkage between initial infection through mosquitoes and the  
504 more advanced disease stages as well as morbidity management practices are necessary. Training  
505 guidelines for healthcare providers and community health workers working in endemic districts  
506 should equip them with the necessary knowledge that can help them deliver key health messages  
507 such as how to conduct home based care for lymphoedema patients and the importance of  
508 hydrocele surgery which are necessary for the success of morbidity management programmes.  
509 Health education campaigns at community level should also address some of the patients  
510 concerns surrounding access to care including reduced patient motivation to maintain  
511 lymphoedema management practices and fear of taking up hydrocele surgery. There is also a

512 need strengthen referral systems to ensure patients not only get appropriate care but that  
513 subsequent follow up is made possible. Furthermore, MMDP programmes should include  
514 strategies that seek to empower LF patients by ensuring that they get the required information,  
515 to access and use the services at the health facilities.

## 516 **Acknowledgements**

517 We would like to acknowledge Edson Musonda and Frank Shamilimo from the Ministry of  
518 Health who facilitated the study process. This work received financial support from the Coalition  
519 for Operational Research on Neglected Tropical Diseases (COR-NTD), which is funded at The  
520 Task Force for Global Health primarily by the Bill & Melinda Gates Foundation, by the UK aid  
521 from the British government, and by the United States Agency for International Development  
522 through its Neglected Tropical Diseases Program.

523

## 524 **References**

- 525 1. Kyu HH, Abate D, Abate KH, Abay SM, Abbafati C, Abbasi N, et al. Global, regional, and  
526 national disability-adjusted life-years (DALYs) for 359 diseases and injuries and healthy life  
527 expectancy (HALE) for 195 countries and territories, 1990–2017: a systematic analysis for  
528 the Global Burden of Disease Study 2017. *The Lancet*. 2018;392: 1859–1922.
- 529 2. World Health Organization. Global programme to eliminate lymphatic filariasis: progress  
530 report, 2018. *Wkly Epidemiol Rec*. 2019;94: 457–470.
- 531 3. World Health Organization. Lymphatic filariasis: managing morbidity and preventing  
532 disability: an aide-mémoire for national programme managers. World Health Organization;  
533 2013. Report No.: 924150529X.
- 534 4. Bangert M, Molyneux DH, Lindsay SW, Fitzpatrick C, Engels D. The cross-cutting  
535 contribution of the end of neglected tropical diseases to the sustainable development goals.  
536 *Infect Dis Poverty*. 2017;6: 73.
- 537 5. Engels D. Neglected tropical diseases in the Sustainable Development Goals. *The Lancet*.  
538 2016;387: 223–224.
- 539 6. Fitzpatrick C, Engels D. Leaving no one behind: a neglected tropical disease indicator and  
540 tracers for the Sustainable Development Goals. *Int Health*. 2016;8: i15–i18.

- 541 7. Levesque J-F, Harris MF, Russell G. Patient-centred access to health care: conceptualising  
542 access at the interface of health systems and populations. *Int J Equity Health*. 2013;12: 18.
- 543 8. Ministry of Health, Zambia. Elimination of Neglected Tropical Diseases National  
544 Masterplan 2019-2023. Lusaka, Zambia; 2019.
- 545 9. Mwase ET, Stensgaard A-S, Nsakashalo-Senkwe M, Mubila L, Mwansa J, Songolo P, et al.  
546 Mapping the geographical distribution of lymphatic filariasis in Zambia. *PLoS Negl Trop*  
547 *Dis*. 2014;8: e2714.
- 548 10. Ritchie J, Spencer L. Qualitative data analysis for applied policy research. *Qual Res*  
549 *Companion*. 2002;573: 305–29.
- 550 11. Hailemariam M, Fekadu A, Selamu M, Medhin G, Prince M, Hanlon C. Equitable access  
551 to integrated primary mental healthcare for people with severe mental disorders in  
552 Ethiopia: a formative study. *Int J Equity Health*. 2016;15: 121.
- 553 12. Davy C, Harfield S, McArthur A, Munn Z, Brown A. Access to primary health care services  
554 for Indigenous peoples: A framework synthesis. *Int J Equity Health*. 2016;15: 163.
- 555 13. Silumbwe A, Halwindi H, Zulu JM. How community engagement strategies shape  
556 participation in mass drug administration programmes for lymphatic filariasis: The case of  
557 Luangwa District, Zambia. *PLoS Negl Trop Dis*. 2019;13: e0007861.
- 558 14. Adhikari RK, Sherchand JB, Mishra SR, Ranabhat K, Pokharel A, Devkota P, et al. Health-  
559 seeking behaviors and self-care practices of people with filarial lymphoedema in Nepal: a  
560 qualitative study. *J Trop Med*. 2015;2015.
- 561 15. Kouassi BL, Barry A, Heitz-Tokpa K, Krauth SJ, Goépogui A, Baldé MS, et al. Perceptions,  
562 knowledge, attitudes and practices for the prevention and control of lymphatic filariasis in  
563 Conakry, Republic of Guinea. *Acta Trop*. 2018;179: 109–116.
- 564 16. Akogun O, Akogun M, Apake E, Kale O. Rapid community identification, pain and  
565 distress associated with lymphoedema and adenolymphangitis due to lymphatic filariasis in  
566 resource-limited communities of North-eastern Nigeria. *Acta Trop*. 2011;120: S62–S68.



- 567 17. Person B, Addiss DG, Bartholomew LK, Meijer C, Pou V, Van den Borne B. Health-seeking  
568 behaviors and self-care practices of Dominican women with lymphoedema of the leg:  
569 implications for lymphoedema management programs. *Filaria J.* 2006;5: 1-9.
- 570 18. Babu BV, Mishra S, Nayak AN. Marriage, sex, and hydrocele: an ethnographic study on the  
571 effect of filarial hydrocele on conjugal life and marriageability from Orissa, India. *PLoS*  
572 *Negl Trop Dis.* 2009;3: e414.
- 573 19. Stanton MC, Best A, Cliffe M, Kelly-Hope L, Biritwum N, Batsa L, et al. Situational analysis  
574 of lymphatic filariasis morbidity in Ahanta West District of Ghana. *Trop Med Int Health.*  
575 2016;21: 236-244.
- 576 20. Kumari AK, Das L. Issues in delivering morbidity management for lymphatic filariasis  
577 elimination: a study in Pondicherry, South India. *Sci World J.* 2012;2012.
- 578 21. Yahathugoda T, Wickramasinghe D, Weerasooriya M, Samarawickrema W. Lymphoedema  
579 and its management in cases of lymphatic filariasis: the current situation in three suburbs  
580 of Matara, Sri Lanka, before the introduction of a morbidity-control programme. *Ann Trop*  
581 *Med Parasitol.* 2005;99: 501-510.
- 582 22. Perera M, Whitehead M, Molyneux D, Weerasooriya M, Gunatilleke G. Neglected patients  
583 with a neglected disease? A qualitative study of lymphatic filariasis. *PLoS Negl Trop Dis.*  
584 2007;1: e128.
- 585 23. Wharton-Smith A, Rassi C, Batisso E, Ortu G, King R, Endriyas M, et al. Gender-related  
586 factors affecting health seeking for neglected tropical diseases: findings from a qualitative  
587 study in Ethiopia. *PLoS Negl Trop Dis.* 2019;13: e0007840.
- 588 24. Sodahlon YK, Dorkenoo AM, Morgah K, Nabiliou K, Agbo K, Miller R, et al. A success  
589 story: Togo is moving toward becoming the first sub-Saharan African nation to eliminate  
590 lymphatic filariasis through mass drug administration and countrywide morbidity  
591 alleviation. *PLoS Negl Trop Dis.* 2013;7: e2080.
- 592 25. Malecela MN, Lazarus W, Mwingira U, Mwakitalu E, Makene C, Kabali C, et al.  
593 Eliminating LF: a progress report from Tanzania. *J Lymphoedema.* 2009;4: 10-12.

594 26. Silumbwe A, Zulu JM, Halwindi H, Jacobs C, Zgambo J, Dambe R, et al. A systematic review  
595 of factors that shape implementation of mass drug administration for lymphatic filariasis  
596 in sub-Saharan Africa. BMC Public Health. 2017;17: 484.

597

598

599

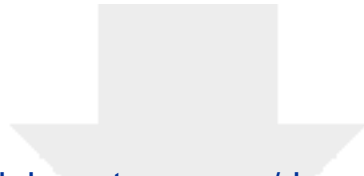

Click here to access/download  
**Supporting Information**  
S1 Appendix.docx

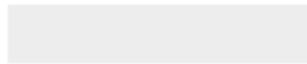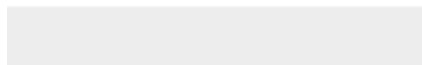

**Reviewer 1.**

1. The authors are presenting the findings of a KAPP (knowledge attitude, practices and perceptions) study on lymphatic filarial disease aetiology and management among three stakeholder groups ( patients, community and health providers) in an endemic setting in the district of Luangwa in Zambia where the majority appear to be of low educational attainment with more or less primitive health care facilities. The writing needs to be improved overall so as to improve the clarity of the message conveyed, Results documented were insufficient and erroneous and not presented clearly.

Thank you very much for your feedback. The authors have reviewed the writing and made suitable edits to ensure that the reader experience is improved.

2. I feel that the title “ Access to morbidity management and disability prevention services for lymphatic filariasis in Luangwa district, Zambia: A mixed methods study” is somewhat inappropriate as the manuscript does not detail the availability of MMDP health services in the region (number of health facilities that can perform hydrocelectomies, facilities which provide limb care etc. ). Without knowing the availability of baseline facilities I feel that you cannot discuss access (defined as “opportunity to reach and obtain appropriate health care services in situations of perceived need for care” ) to these services. What the authors are describing are the health seeking behavior of patients and factors that influence the behavior patterns.

As part of the baseline assesment, a rapid assessment in 8 of the 16 health facilities in the district and their ability to provide MMDP services was conducted. It was found that very few of them were suitably equipped to provide these services. A brief statement on the availability of services at the health facilities in the area has been included within the description of the study settings of the paper (Lines 150-167). However, we have adjusted the manuscript to primarily reflect community perspective around health seeking behaviour as per the reviewer’s suggestion.

3. Overall writing is poor and the meaning of certain statements are rather ambiguous and not clear. This is just one of the instances, Eg, “...of the MMDP intervention such as the design training curriculums, health education and...” .There are many more grammatical errors which need to be attended.

The authors have reviewed the manuscript and paid attention to the concern by the reviewer on grammatical errors and resolved them.

4. The KAPPP findings were interesting but somewhat vague due to lack of quantitative data. I feel that the Results section need to be re-written as presentation of research findings is not very clear and rather confusing as outcomes of all surveys are presented together and discussed in this section. Furthermore the data given in the results section appear to be incorrect. Percentages without the actual values of the variable are unacceptable as there is no way to verify the accuracy of data. Perhaps using tables to present the quantitative data may increase the clarity of the findings. The results of the 3 surveys; patient KAPPP, FGD

and interviews ( specify the group, primary health care providers/ Key informants/ community leaders?) if presented separately may be clearer to the reader as well as the authors

Based on the feedback from the reviewers, the authors decided to focus on the qualitative findings and present the quantitative findings as a separate publication. As such the manuscript only present a revised version of the qualitative findings.

5. Is it possible to specify the key areas that were investigated by the KAPP survey, the questions included to the questionnaire ? used on the patients, In the FGDs were the same questions asked from the community was it approached differently? Was the approach similar for all FGDs? With regard to interviews detail the core areas that were covered

We have included a descriptions of the key questions that were asked during the interviews and focus groups as well as added the data collection tools as supplementary file (Lines 184-186 & S1 Appendix).

6. The basic results documented are erroneous and contradictory, Lines 229 & 230; Patient characteristics There were 237 pts.....199 hydrocele, 27 lymphoedema, 7 both lymphoedema and hydrocele, addition brings the total to 233, Line 320 says of the 22 patients with lymphedema? I think even the authors are not clear about how many patients had lymphoedema. The number of lymphoedema patients are rather low to discuss the morbidity management measures practiced by them. Presenting the results as percentages is not acceptable, include the actual value of the variables as well.

As mentioned above, the quantitative component of the assessment has been removed to focus on the qualitative findings from the interviews and the focus group discussions.

7. Line 239, Knowledge of lymphedema, elephantiasis and hydrocele, It is important to document the disease knowledge among patients rather than community, there is no data on this aspect.

The selection of participants for the focus group discussions also included lymphoedema and hydrocele patients to ensure that their perspectives were also represented.

8. With regard to FGD, what was the composition of the sample? (It says a convenient sample) how many patients were included? What was the age range?

The FGDs were comprised of community members aged 18-50 drawn from sampled health facility catchment areas who were able to attend the discussion.

9. Line 354, Social norms. Appear to be contradictory” Having hydrocele is viewed as a marker of high social standing and men who had it are more likely to be chosen as headmen as they are perceived to be old and wise” and the statement “Though LF patients were considered to be in a pitiful state” and lines 376-380 under Stigmatization ” Fear of stigmatization also inhibits patients’ ability to seek care....would either deny having the condition or request to talk to them in private because they are afraid that they would be laughed at if other community members found out. Are these statement derived from the FGD or are these the authors views?

The statements were derived from the data that was collected, a verbatim quote has been included in the section on stigmatization (Lines 425-429).

10. Beliefs (line 342) were these derived from FGDs or Patient surveys or past publications? (Shawa et al 2013)

All the findings presented are drawn from the data collected during the focus group discussions and the interviews.

11. The manuscript is too lengthy and include a lot of detail on implementation research approaches ( lines 102-126 ) patient access to care frame work guidelines (191-195 )but detail (data) on the current study outcomes and the Discussion are inadequate. The authors should compare and discuss the similarities and differences of their results with past reports (publications) on LF in Zimbabwe and elsewhere, discuss the limitations of the study etc.

After revisions based on reviewer's comments, the length of the manuscript has reduced. We have also drawn comparisons with other relevant studies and situated our work within the field.

### **Reviewer 2.**

1. The manuscript is too long given the number of focus groups and in-depth interview conducted. I would suggest the authors to focus on the key findings than listing everything here.

The authors reviewed the manuscript and reviewer's comments and decided to focus specifically on the qualitative findings which have been presented, due to these changes the length of the manuscript has reduced.

2. In the study setting please give clear description of the study setting. When was the LF treatment started in the district? How many health facilities are there in the district? What type of health facilities? How is the function of the health system organized in the district etc.

We have included a description of the local primary health system (Lines 150-167).

3. The discussion part is very brief I would suggest the authors would include, comparing their findings with previous studies, the key limitations of their study. The implication of the current study to programme planning and implementation and some recommendations.

The discussion section of the manuscript has been expanded to factor in similar studies in other settings as well having limitations and recommendations.

### **Reviewer 3.**

1. Overall a reasonably written paper addressing a neglected topic, especially in Zambia. The use of mixed methods is good, however as little more delineation between the different groups would be helpful so it is easier to see who is saying what.

The authors have rewritten the results section and included quotations to indicate sources of information alongside relevant textual descriptions.

2. In the abstract the findings could include more hard data/figures as it is a little vague and the challenges should link to the paper key themes so there is consistency

The authors rewrote the abstract to clearly articulate the major findings from the study.

3. The discussion needs more references supporting the statements.

The authors have reviewed additional references and included relevant ones within the introduction and discussion sections of the manuscript.

4. MMDP - inconsistency in how it is presented i.e. sometime abbreviated but not always. Please check all

We have made revisions to ensure that MMDP is used consistently throughout the manuscript.

5. The authors may want to highlight the economic benefits of surgery as published in PloS recently <https://www.ncbi.nlm.nih.gov/pubmed/32210436>. This paper also has a number of references that the authors here could use/include to better back some of the statements.

Thank you for this recommendation, the authors have included some of the relevant publications within the revised version.

6. In general there is a lack of references to support the paper

The authors have reviewed additional references and included relevant ones within the introduction and discussion sections of the manuscript.

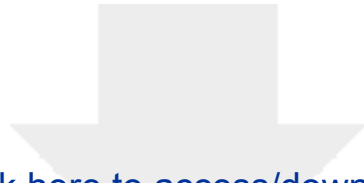

[Click here to access/download](#)

**Revised Article with Changes Highlighted**

Revised Access to MMDP Services in Luangwa PM.docx

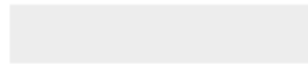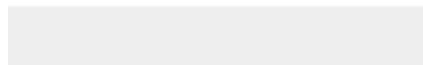

Supplement: pntd.0009075.s004.pdf [file pntd.0009075.s004.pdf]
