# Supplementary material for: Health beliefs and health seeking behavior towards lymphatic filariasis morbidity management and disability prevention services in Luangwa District, Zambia: Community and provider perspectives
Source: PubMed Central journal article supplement (PMC7932505; doi:10.1371/journal.pntd.0009075), 2021-02-22
Supplement: pntd.0009075.s002.pdf [file pntd.0009075.s002.pdf]

# PLOS Neglected Tropical Diseases

## Access to morbidity management and disability prevention services for lymphatic filariasis in Luangwa district, Zambia: A mixed methods study.

--Manuscript Draft--

|                                                                                                                                                                                                                                                                                                                                                                                      |                                                                                                                                                                                                                                                                                                                                                                                                                                                                                                                                                                                                                                                                                                                                                                                                                                                                                                                                                                                                                                                                                                                                                                                                                                                                                                                                                                                                                                                                                                                                                                                                                                                                                                                                                                                                                                                                                                                                                                                                                                                                                                                                                                                                                                                       |
|--------------------------------------------------------------------------------------------------------------------------------------------------------------------------------------------------------------------------------------------------------------------------------------------------------------------------------------------------------------------------------------|-------------------------------------------------------------------------------------------------------------------------------------------------------------------------------------------------------------------------------------------------------------------------------------------------------------------------------------------------------------------------------------------------------------------------------------------------------------------------------------------------------------------------------------------------------------------------------------------------------------------------------------------------------------------------------------------------------------------------------------------------------------------------------------------------------------------------------------------------------------------------------------------------------------------------------------------------------------------------------------------------------------------------------------------------------------------------------------------------------------------------------------------------------------------------------------------------------------------------------------------------------------------------------------------------------------------------------------------------------------------------------------------------------------------------------------------------------------------------------------------------------------------------------------------------------------------------------------------------------------------------------------------------------------------------------------------------------------------------------------------------------------------------------------------------------------------------------------------------------------------------------------------------------------------------------------------------------------------------------------------------------------------------------------------------------------------------------------------------------------------------------------------------------------------------------------------------------------------------------------------------------|
| <b>Manuscript Number:</b>                                                                                                                                                                                                                                                                                                                                                            | PNTD-D-20-00131                                                                                                                                                                                                                                                                                                                                                                                                                                                                                                                                                                                                                                                                                                                                                                                                                                                                                                                                                                                                                                                                                                                                                                                                                                                                                                                                                                                                                                                                                                                                                                                                                                                                                                                                                                                                                                                                                                                                                                                                                                                                                                                                                                                                                                       |
| <b>Full Title:</b>                                                                                                                                                                                                                                                                                                                                                                   | Access to morbidity management and disability prevention services for lymphatic filariasis in Luangwa district, Zambia: A mixed methods study.                                                                                                                                                                                                                                                                                                                                                                                                                                                                                                                                                                                                                                                                                                                                                                                                                                                                                                                                                                                                                                                                                                                                                                                                                                                                                                                                                                                                                                                                                                                                                                                                                                                                                                                                                                                                                                                                                                                                                                                                                                                                                                        |
| <b>Short Title:</b>                                                                                                                                                                                                                                                                                                                                                                  | Morbidity management & disability prevention services for lymphatic filariasis.                                                                                                                                                                                                                                                                                                                                                                                                                                                                                                                                                                                                                                                                                                                                                                                                                                                                                                                                                                                                                                                                                                                                                                                                                                                                                                                                                                                                                                                                                                                                                                                                                                                                                                                                                                                                                                                                                                                                                                                                                                                                                                                                                                       |
| <b>Article Type:</b>                                                                                                                                                                                                                                                                                                                                                                 | Research Article                                                                                                                                                                                                                                                                                                                                                                                                                                                                                                                                                                                                                                                                                                                                                                                                                                                                                                                                                                                                                                                                                                                                                                                                                                                                                                                                                                                                                                                                                                                                                                                                                                                                                                                                                                                                                                                                                                                                                                                                                                                                                                                                                                                                                                      |
| <b>Keywords:</b>                                                                                                                                                                                                                                                                                                                                                                     | Implementation Research; Lymphatic Filariasis; Morbidity management and disability prevention                                                                                                                                                                                                                                                                                                                                                                                                                                                                                                                                                                                                                                                                                                                                                                                                                                                                                                                                                                                                                                                                                                                                                                                                                                                                                                                                                                                                                                                                                                                                                                                                                                                                                                                                                                                                                                                                                                                                                                                                                                                                                                                                                         |
| <b>Abstract:</b>                                                                                                                                                                                                                                                                                                                                                                     | <p><b>Introduction</b><br/>Morbidity management and disability prevention (MMDP) services are essential for the management of lymphoedema, elephantiasis and hydrocele that result from lymphatic filariasis (LF) infection. However, there is little information on the access and utilization of MMDP services in Zambia. This study sought to evaluate in status of LF morbidity, utilization and factors affecting access to MMDP services in Luangwa District, Zambia.</p> <p><b>Methods</b><br/>A concurrent mixed methods study that included a descriptive cross-sectional survey of 237 patients, 4 Focus group discussions and 20 interviews were conducted. Data that was collected included knowledge of LF morbidity, existing morbidity management practices, health seeking behavior, factors affecting access to MMDP services and potential areas of integration of MMDP services into the primary health care system.</p> <p><b>Findings</b><br/>The most common LF morbidity in the district was hydrocele. There were low levels of knowledge on the causes, symptoms and disease management practices among the different stakeholders. It was common for patients to seek care from both health facilities and traditional healers. 51.0% of hydrocele patients had sought care from a medical facility and 62.5% had gone traditional healers and utilization of surgeries for hydrocele was poor. The main challenges to access included, limited understanding of the disease, lack of awareness of existing MMDP services, unfavorable cultural and social norms, poor motivation to maintain disease management practices and inadequate resources at health facilities. Opportunities for integration included embedding aspects of MMDP services in community structures, existing health services and building capacity both health providers and community health workers.</p> <p><b>Conclusion</b><br/>Improving access to morbidity management and disability prevention services for LF will require national programmes to effectively map patients and services within health systems. This will streamline existing services and create the much-needed demand for vulnerable and disadvantaged populations.</p> |
| <b>Additional Information:</b>                                                                                                                                                                                                                                                                                                                                                       |                                                                                                                                                                                                                                                                                                                                                                                                                                                                                                                                                                                                                                                                                                                                                                                                                                                                                                                                                                                                                                                                                                                                                                                                                                                                                                                                                                                                                                                                                                                                                                                                                                                                                                                                                                                                                                                                                                                                                                                                                                                                                                                                                                                                                                                       |
| <b>Question</b>                                                                                                                                                                                                                                                                                                                                                                      | <b>Response</b>                                                                                                                                                                                                                                                                                                                                                                                                                                                                                                                                                                                                                                                                                                                                                                                                                                                                                                                                                                                                                                                                                                                                                                                                                                                                                                                                                                                                                                                                                                                                                                                                                                                                                                                                                                                                                                                                                                                                                                                                                                                                                                                                                                                                                                       |
| <p><b>Financial Disclosure</b></p> <p>Enter a financial disclosure statement that describes the sources of funding for the work included in this submission. Review the <a href="#">submission guidelines</a> for detailed requirements. View published research articles from <a href="#">PLOS NTDs</a> for specific examples.</p> <p>This statement is required for submission</p> | <p>This study was funded by the Coalition for Operational Research on Neglected Tropical Diseases (COR-NTD),(<a href="https://www.ntdsupport.org/cor-ntd/ntd-connector/term/ntdsc">https://www.ntdsupport.org/cor-ntd/ntd-connector/term/ntdsc</a>), under Grant Number:NTD-SC #163D and was awarded to CM. The funders had no role in study design, data collection and analysis, decision to publish, or preparation of the manuscript.</p>                                                                                                                                                                                                                                                                                                                                                                                                                                                                                                                                                                                                                                                                                                                                                                                                                                                                                                                                                                                                                                                                                                                                                                                                                                                                                                                                                                                                                                                                                                                                                                                                                                                                                                                                                                                                         |

and **will appear in the published article** if the submission is accepted. Please make sure it is accurate.

#### Unfunded studies

Enter: *The author(s) received no specific funding for this work.*

#### Funded studies

Enter a statement with the following details:

- Initials of the authors who received each award
- Grant numbers awarded to each author
- The full name of each funder
- URL of each funder website
- Did the sponsors or funders play any role in the study design, data collection and analysis, decision to publish, or preparation of the manuscript?
- **NO** - Include this sentence at the end of your statement: *The funders had no role in study design, data collection and analysis, decision to publish, or preparation of the manuscript.*
- **YES** - Specify the role(s) played.

\* typeset

#### Competing Interests

Use the instructions below to enter a competing interest statement for this submission. On behalf of all authors, disclose any [competing interests](#) that could be perceived to bias this work—acknowledging all financial support and any other relevant financial or non-financial competing interests.

This statement **will appear in the published article** if the submission is accepted. Please make sure it is

The authors have declared that no competing interests exist.

accurate. View published research articles from [PLOS NTDs](#) for specific examples.

**NO authors have competing interests**

Enter: *The authors have declared that no competing interests exist.*

**Authors with competing interests**

Enter competing interest details beginning with this statement:

*I have read the journal's policy and the authors of this manuscript have the following competing interests: [insert competing interests here]*

\* typeset

**Data Availability**

Yes - all data are fully available without restriction

Authors are required to make all data underlying the findings described fully available, without restriction, and from the time of publication. PLOS allows rare exceptions to address legal and ethical concerns. See the [PLOS Data Policy](#) and [FAQ](#) for detailed information.

A Data Availability Statement describing where the data can be found is required at submission. Your answers to this question constitute the Data Availability Statement and **will be published in the article**, if accepted.

**Important:** Stating 'data available on request from the author' is not sufficient. If your data are only available upon request, select 'No' for the first question and explain your exceptional situation in the text box.

Do the authors confirm that all data underlying the findings described in their manuscript are fully available without restriction?

**Describe where the data may be found in full sentences. If you are copying our sample text, replace any instances of XXX with the appropriate details.**

- If the data are **held or will be held in a public repository**, include URLs, accession numbers or DOIs. If this information will only be available after acceptance, indicate this by ticking the box below. For example: *All XXX files are available from the XXX database (accession number(s) XXX, XXX).*
- If the data are all contained **within the manuscript and/or Supporting Information files**, enter the following: *All relevant data are within the manuscript and its Supporting Information files.*
- If neither of these applies but you are able to provide **details of access elsewhere**, with or without limitations, please do so. For example:

*Data cannot be shared publicly because of [XXX]. Data are available from the XXX Institutional Data Access / Ethics Committee (contact via XXX) for researchers who meet the criteria for access to confidential data.*

*The data underlying the results*

The data underlying the results presented in the study are available from Taskforce for Global Health and will be made available through <https://www.ntdsupport.org/cor-ntd/ntd-connector/term/ntdsc> at the completion of all study activities.

*presented in the study are available from (include the name of the third party and contact information or URL).*

- This text is appropriate if the data are owned by a third party and authors do not have permission to share the data.

\* typeset

Additional data availability information:

1 **Full title: Access to morbidity management and disability prevention services for lymphatic**  
2 **filariasis in Luangwa district, Zambia: A mixed methods study.**

3

4 **Short title: Morbidity management & disability prevention services for lymphatic filariasis**

5

6 **Authors and affiliations**

7 Patricia Maritim<sup>1\*</sup>, Adam Silumbwe<sup>2¶</sup>, Joseph Mumba Zulu<sup>1¶</sup>, George Sichone<sup>3¶</sup>, Charles  
8 Michelo<sup>6¶</sup>

9 <sup>1</sup> Department of Health Promotion and Education, University of Zambia School of Public  
10 Health, Lusaka, Zambia.

11 <sup>2</sup> Department of Health Policy and Management, University of Zambia School of Public Health,  
12 Lusaka, Zambia.

13 <sup>3</sup> Participatory Research and Innovations Management, Lusaka, Zambia.

14

15 **Corresponding Author**

16 \* Patricia Maritim: [triciamarie20@gmail.com](mailto:triciamarie20@gmail.com)

17

18 <sup>¶</sup>These authors contributed equally to this work.

19 <sup>&</sup> These authors also contributed equally to this work

20

21

## 22 **Abstract**

### 23 **Introduction**

24 Morbidity management and disability prevention (MMDP) services are essential for the  
25 management of lymphoedema, elephantiasis and hydrocele that result from lymphatic filariasis  
26 (LF) infection. However, there is little information on the access and utilization of MMDP  
27 services in Zambia. This study sought to evaluate **in** status of LF morbidity, utilization and factors  
28 affecting access to MMDP services in Luangwa District, Zambia.

### 29 **Methods**

30 A concurrent mixed methods study that included a descriptive cross-sectional survey of 237  
31 patients, 4 Focus group discussions and 20 interviews were conducted. Data that was collected  
32 included knowledge of LF morbidity, existing morbidity management practices, health seeking  
33 behavior, factors affecting access to MMDP services and potential areas of integration of MMDP  
34 services into the primary health care system.

### 35 **Findings**

36 The most common LF morbidity in the district was hydrocele. There were low levels of  
37 knowledge on the causes, symptoms and disease management practices among the different  
38 stakeholders. It was common for patients to seek care from both health facilities and traditional  
39 healers. 51.0% of hydrocele patients had sought care from a medical facility and 62.5% had **gone**  
40 traditional healers and utilization of surgeries for hydrocele was poor. The main challenges to  
41 access included, limited understanding of the disease, lack of awareness of existing MMDP  
42 services, unfavorable cultural and social norms, poor motivation to maintain disease  
43 management practices and inadequate resources at health facilities. Opportunities for  
44 integration included embedding aspects of MMDP services in community structures, existing  
45 health services and building **capacity** both health providers and community health workers.

46 **Conclusion**

47 Improving access to morbidity management and disability prevention services for LF will require  
48 national programmes to effectively map patients and services within health systems. This will  
49 streamline existing services and create the much-needed demand for vulnerable and  
50 disadvantaged populations.

51 **Author Summary**

52 Lymphatic filariasis (LF) infection if untreated usually results in fluid accumulation in the limbs  
53 or breasts (lymphoedema) or genitalia (hydrocele) that is painful and causes great discomfort.  
54 Morbidity management and disability prevention (MMDP) strategies such as surgery for  
55 hydrocele, treatment of acute attacks and management of lymphoedema are necessary for the  
56 management of the **advances** stages of LF. However very few countries including Zambia have  
57 adequate information on the availability of MMDP services and quality of care for LF patients.  
58 This study explored the utilization of MMDP services and factors that influence access to  
59 appropriate care in a highly endemic region, Luangwa District, Zambia between February and  
60 April 2019. Utilization of MMDP services was low. Factors affecting access to MMDP services  
61 included lack of **awareness of existing services**, misconceptions about the disease, social and  
62 cultural norms, gender, availability of resources and adherence to disease management practices.  
63 Potential avenues for the integration of MMDP services into the existing health system include  
64 included embedding aspects of MMDP services in community structures, existing health services  
65 and building capacity both health providers and community health workers.

66

67

68

69

70



## 71 **Background**

72 Lymphatic filariasis (LF), a neglected tropical disease, causes permanent disability through  
73 chronic manifestations of lymphoedema and hydrocele accounting for 1.36 million disability  
74 adjusted life years [1]. Globally more than 890 million people living in 49 endemic countries face  
75 the risk of infection and an estimated 40 million have chronic manifestations of the disease [2].  
76 Diseases control programmes have mostly targeted the interruption of LF transmission through  
77 mass drug administration (MDA) whilst placing less emphasis on promoting morbidity  
78 management and disability prevention services (MMDP) for those presenting with chronic  
79 manifestations. The basic care package for MMDP services includes individual treatment to  
80 destroy microfilaria, treatment for episodes of adenolymphangitis (acute attacks), management  
81 of lymphoedema to prevent disease progression and surgery for hydrocele [3]. Since 2000, MDA  
82 for LF programs have delivered 7.7 billion cumulative number of treatments to people living in  
83 endemic areas [2], whilst fewer lymphoedema and hydrocele patients have accessed to MMDP  
84 services in the same period.

85 According to the World Health Organization (WHO), MMDP services should be included in  
86 the basic primary healthcare package, and constitute an indicator for equity in progress towards  
87 SDG 3.8 and universal health coverage. However, progress towards establishing and streamlining  
88 MMDP services still remains considerably slow, particularly in the Africa, which accounts for a  
89 considerable proportion of the LF burden. Out of the 34 LF endemic countries in the African  
90 region, only 12 have indicated as having MMDP services for LF patients. WHO reports that even  
91 data on MMDP services is rarely captured across countries. Global efforts to eliminate LF  
92 through MDA are likely to stop beyond 2020, and strategic direction of diseases control will  
93 most likely pivot towards MMDP services.

94 In Zambia, LF is a public health concern as 87 of 118 districts are considered endemic [2, 4].  
95 MDA for LF was first piloted in Western Province in 2014, and then scaled up nationally in  
96 2015 with annual campaigns to be implemented until 2019. In 2018, national MDA for LF  
97 coverage was reported at 90.8 % [2]. Morbidity mapping of LF patients has been concurrently  
98 conducted with the implementation of MDA for LF campaigns. The mapping exercise has shown  
99 that there are many cases of hydrocele and lymphedema spread across all ten provinces in the  
100 country. However, there is limited information of what MMDP services are available, where and  
101 how LF patients are accessing them.

102 The Elimination of Neglected Tropical Diseases National Masterplan 2019-2023 has placed huge  
103 emphasis on disability prevention due to LF. However, Zambia currently lacks a comprehensive  
104 national MMDP strategy for LF or suitable indicators to monitor the provision of MMDP services  
105 [4]. As part of efforts to generate evidence to guide MMDP strategy formulation, the Ministry of  
106 Health in collaboration with the University of Zambia, School of Public Health developed a pilot  
107 initiative using implementation research approaches to identify the most appropriate  
108 mechanisms through which MMDP services can be streamlined and integrated into existing  
109 primary health care systems in Luangwa District to inform potential scale up.

110 Implementation research plays a vital role in Neglected tropical disease control programmes as  
111 it makes it possible to identify optimum conditions that promote implementation success. By  
112 exploring the process through which disease control interventions are implemented and the ways  
113 in which contextual factors may affect implementation. The pilot initiative used an embedded  
114 implementation research approach whereby a range of stakeholders including programme  
115 implementers, researchers and communities living in the endemic district were involved in all  
116 phases of the pilot initiative from problem identification, mapping of the status of MMDP  
117 services, validation of findings, intervention development and implementation.

118 This study presents the findings of a preliminary baseline assessment conducted prior to the  
119 development and implementation of the pilot initiative. Specifically, this paper reports on the  
120 perspectives of health providers, community members and patients on their knowledge of LF  
121 morbidity, morbidity management practices, health seeking behavior, factors affecting access to  
122 MMDP services and potential areas of integration of MMDP services into the existing primary  
123 health systems in Luangwa District. This information would be used to tailor the components  
124 of the MMDP intervention such as the design training curriculums, health education and  
125 community sensitization materials, strengthening the data management and referral structures  
126 as well as identification of potential areas for integration.

## 127 **Methods**

### 128 **Study design**

129 This was a concurrent mixed method study conducted as a formative assesment for a larger study  
130 that sought to develop and implement an integrated health system intervention to improve access  
131 of MMDP services for LF patients within Luangwa District of Lusaka, Zambia.

### 132 **Study setting**

133 The study was conducted between February and April 2019 in Luangwa District, which has one  
134 of the highest prevalence of the Circulating Filarial Antigen [5] as it found along the Luangwa  
135 river valley. The district is predominantly rural with an estimated population of 31,665, covered  
136 by a total of 17 health facilities.

### 137 **Baseline mapping of patients**

138 Prior to conducting the study, a census of LF was done to map the distribution of cases across  
139 the health facility catchment areas and formed the basis for sampling for the data collection.  
140 Community health workers (CHWs) went from household to household identifying patients  
141 who exhibited signs of lymphoedema, elephantiasis and hydrocele.

142 **Patient descriptive cross-sectional survey**

143 A total of 237 patients were identified during the mapping exercise all of whom were invited to  
144 take part in the study. The recruitment of study participants for the patient survey was done by  
145 the CHWs, within the health facilities and surrounding communities with the help of the study  
146 team and staff from the District Health Office. Trained CHWs administered a structured KAP  
147 questionnaire. All patients who were identified during the mapping exercise agreed to take part  
148 in the study. Interviews were held within the homes LF patients to ensure that their privacy and  
149 confidentiality was upheld.

150 **Focus group discussions**

151 There were 4 focus group discussions (FGD) held in Luangwa Boma and Mphuka health facility  
152 catchment areas that had the highest number of patients in the district. The FGDs were an  
153 opportunity to collect information on community level understanding of the chronic stages of  
154 LF, practices used to manage the conditions and access to health care.

155 Participants were conveniently sampled from the communities living in the catchment areas and  
156 included LF patients. Potential study participants were identified by community health workers  
157 working in the catchment areas and were invited by telephone to participate by the health facility  
158 in-charges. In terms of composition, the FGDs were mixed with regard to age but were separated  
159 by gender (2 male and 2 female.) The gender separation was essential given that in the  
160 communities living in the area, hydrocele is considered a sensitive topic of discussion and this  
161 would encourage community members to speak freely. Each FGD had between 10 and 12  
162 participants. The FGDs were conducted at the health facility but away from patient areas to  
163 ensure the privacy of the participants and avoid interruptions. The FGDs lasted for 1 hour 30  
164 minutes to 2 hours.

165 **Interviews**

166 Interviews were conducted with district neglected tropical disease focal point persons (n=2) as  
167 well as community health workers (n=8), health facility staff (n=8) and traditional leaders (n=8)  
168 from 8 health facility catchment areas which had the highest number of LF patients in the district  
169 - Luangwa Boma, Mpukha, Katondwe, Kanemela, Chitope, Kasinsa, Luangwa District Hospital  
170 and Mandombe. Participants were purposively sampled based on their involvement in the  
171 implementation of LF elimination programmes in the area. The interviews were used identify  
172 health system factors related to access of MMDP services in the district. A total of twenty  
173 interviews were done with participants invited to take part either through telephone calls or face  
174 to face. Interviews were conducted at the respective health facilities and the Luangwa district  
175 Health Offices. Interviews lasted between 45 minutes to an hour.

#### 176 **Data collection**

177 The KAP questionnaire included questions on knowledge of lymphoedema such as symptoms,  
178 causes and prevention measures, morbidity management practices, health seeking behaviour and  
179 factors affecting their access to care. Factors affecting access to care in the questionnaire,  
180 Interview and FGD guides were adapted from Levesque et al's conceptual framework on patient  
181 centered access to health care [6]. Prior to data collection the data collection tools were pretested  
182 to ensure their suitability and changes made where necessary. All FGDs and interviews were  
183 audio recorded with the consent of the study participants. In addition, field notes were taken  
184 during the course of the interviews. Data collection was done in English and Nyanja to ensure  
185 that all participants were able to articulate their perspectives as comprehensively as possible.

#### 186 **Data analysis**

187 All recordings were transcribed verbatim and those done in Nyanja were translated to English.  
188 A framework analysis approach was applied to analyze the data [7] using Levesque et al's  
189 conceptual framework on patient centered access to health care and has been used in health

190 systems and policy research [6, 8, 9]. The framework defines access as the “opportunity to reach  
191 and obtain appropriate health care services in situations of perceived need for care.” It proposes  
192 that from a health care provider perspective, access to care can be categorized into five  
193 dimensions; approachability, acceptability, availability and accommodation, affordability and  
194 appropriateness. Barriers and facilitators can impact these dimensions which in turn affects an  
195 individual’s ability to utilize health services. By affecting their ability to perceive, ability to seek,  
196 ability to reach, ability to pay and ability to engage with the available health services [6]. These  
197 demand and supply side dimensions formed the coding tree from which predetermined themes  
198 and sub themes were extracted using both inductive and deductive methods to ensure that  
199 existing and emergent themes were exhaustively identified. Preliminary coding of the transcripts  
200 was done by PM and AS. JZ reviewed the coding lists to ensure that identified codes were aligned  
201 to the to the framework. Subsequently PM, AS and JZ jointly reviewed the codes and developed  
202 the final codebook.

203 Quantitative data from the survey was entered in excel template, cleaned to promote data  
204 correctness and thereafter exported to STATA version 13 where it was analysed. Baseline  
205 measures of the different knowledge, awareness and practice questions were summarised using  
206 descriptive statistics. The data was reported as proportions and frequencies. The data the  
207 qualitative and quantitative analysis was then integrated to provide a comprehensive picture of  
208 MMDP in the district. Comparisons to other studies done in LF endemic countries looking at  
209 MMDP, was done to examine the congruence of the identified factors with existing literature  
210 and to gauge the strength of the analysis.

### 211 **Validation of study findings**

212 A stakeholder meeting was held to validate the findings of the study and to confirm that the  
213 information that they provided was accurately reflected in the transcripts. Fifty participants took

214 part in the workshop including Local Chiefs, traditional leaders, Ministry of health staff and  
215 CHWs. Another outcome of the stakeholder validation meeting was the identification of  
216 avenues for potential integration of MMDP services into the health system within the district.  
217 Participants worked together to identify health system strengthening approaches through  
218 identifying underlying mechanisms necessary for successful integration by detailing key health  
219 messages, necessary actors, existing referrals pathways, reporting systems, monitoring and  
220 evaluation systems and mentorship for health workers.

## 221 **Ethics statement**

222 Ethical approval was sought from University of Zambia Biomedical Research Ethics Committee  
223 (REF.017-11-18) and the National Health Research Authority under the Ministry of Health,  
224 Zambia. All participants were informed of the purpose of the assessment, details of study  
225 procedures including freedom to withdraw, potential benefits and risks, prior to the  
226 commencement of data collection. Thereafter written informed consent was obtained as all  
227 participants were 18 years and above.

## 228 **Results**

### 229 **Characteristics of patients.**

230 There were 237 individuals sampled during the mapping exercise and the patient survey, and  
231 from these, 199 (85.4%) had hydrocele, 27 (11.6%) had lymphedema and 7 (3.0%) had both  
232 lymphoedema and hydrocele. A majority of the participants were male (90.7%). The mean age  
233 was 46.9 (S.D 21.4). Most of the survey participants practiced Christianity (96.2%), were married  
234 (66.2%) and had lived in the area for more than 5 years (86 %.) For most of the study participants  
235 the highest level of education that they had attended was primary school (70.5%) as shown in  
236 Table 1.

237 Table 1. Demographic characteristics of LF Patients in Luangwa District

| <b>Variable</b>                | <b>Proportion</b><br>(total sample=237) |
|--------------------------------|-----------------------------------------|
| <b>Gender</b>                  |                                         |
| 1= Female                      | 9.3% (22)                               |
| 2= Male                        | 90.7% (215)                             |
| <b>Education</b>               |                                         |
| 1= No education                | 14.8% (35)                              |
| 2= Primary School              | 70.5% (167)                             |
| 3= Junior High school          | 3.4% (8)                                |
| 4= Secondary school            | 10.1% (24)                              |
| 5= Vocational training         | 0.4% (1)                                |
| 6= University                  | 0.4% (1)                                |
| 7= Other                       | 0.4% (1)                                |
| <b>Marital Status</b>          |                                         |
| 1= Single                      | 22.8% (54)                              |
| 2= Married                     | 66.2% (157)                             |
| 3= Divorced                    | 3.4% (8)                                |
| 4= Widowed                     | 7.6% (18)                               |
| <b>Income Source</b>           |                                         |
| 1= Unemployed                  | 30.8% (73)                              |
| 2= Agricultural activities     | 52.3% (124)                             |
| 3= Day worker                  | 2.5% (6)                                |
| 4= Small scale enterprise      | 0.4% (1)                                |
| 5= Private sector              | 2.1% (4)                                |
| 6= Civil Servant               | 0.4% (1)                                |
| 7= Other (charcoal, carpentry) | 11.4% (27)                              |



| <b>Monthly Income</b>                         |             |
|-----------------------------------------------|-------------|
| 1= <1000 kwacha                               | 68.8% (161) |
| 2= 1000-4000 kwacha                           | 4.7% (11)   |
| 3= 4000-10000 kwacha                          | 0.4% (1)    |
| 4= > 10000 kwacha                             | 3.8% (9)    |
| 5= I don't know                               | 22.2% (52)  |
| <b>Duration they have lived in study area</b> |             |
| <1 year                                       | 4.2% (10)   |
| 1-5 years                                     | 8.4% (20)   |
| > 5 years                                     | 86% (203)   |
| 5*                                            | 1.3% (3)    |
| <b>Available transport</b>                    |             |
| 1= Car                                        | 3 (1.3)     |
| 2= Bicycle                                    | 46 (19.8)   |
| 3= Motorbike                                  | 1 (0.4)     |
| 4= Walking                                    | 176 (75.9)  |
| 5= Other                                      | 6 (2.6)     |
| <b>Transport to the health facility</b>       |             |
| 1= Car                                        | 2 (0.9)     |
| 2= Bicycle                                    | 12 (5.4)    |
| 3= Motorbike                                  | 19 (8.6)    |
| 4= Walking                                    | 62 (28.1)   |
| 5= Other                                      | 126 (57.0)  |

238

239 **Knowledge of lymphoedema, hydrocele and elephantiasis.**

240 The communities have local names for hydrocele, which is referred to as *tumbu*. There were  
241 various cultural beliefs surrounding the causes of the chronic stages of LF. During the FGDs,  
242 some of the common causes of lymphoedema and elephantiasis that were described included the  
243 belief that the conditions were hereditary and was passed through family lines, eating food that  
244 had not been warmed properly, contact with animal faeces, using traditional medicine such as  
245 local herbal aphrodisiacs *mutoto* and children vomiting on their mothers during breastfeeding.  
246 Reported causes of hydrocele were largely similar to those given for lymphoedema but also  
247 included having sexual contact with women who were menstruating or who've had a miscarriage,  
248 being bewitched, men using pounding sticks after they have been used by women, sitting on  
249 chairs which patients have used and sitting on stones that women use during food preparation.

250 “.... Mostly what brings this disease is the careless sitting on things. For example, sitting on  
251 the stones that women use for fire and also sitting on the stone that women use to grind or  
252 crush mealie meal.....” [FGD1\_ Community Members].

253 Some of the FGD participants were able to correctly identify mosquitoes, which are common in  
254 the area because of the presence of River Luangwa, as the disease-causing vectors. This could be  
255 due to community sensitisation exercises done as part of mass drug distribution rounds  
256 conducted between 2015 and 2018. However only 11.4% patients could correctly identify  
257 mosquitoes as the vector that spreads the disease. When asked to rate their general  
258 understanding of their conditions, a majority of the patients stated that they had a poor  
259 understanding; (86.7% of lymphoedema and 77% of hydrocele patients). Most of the patients  
260 and participants of the FGDs reported knowing patients who lived in their villages or were  
261 members of their families and had lymphedema, elephantiasis or hydrocele.

262 Knowledge levels among traditional leaders, community-based volunteers and health care  
263 providers interviewed differed greatly. Generally, those who had been heavily involved in LF

264 disease control activities such as MDA rounds were more likely to be knowledgeable about the  
265 causes and symptoms of the disease, because they had received training and information to guide  
266 implementation. Most of the traditional leaders interviewed reiterated the prevailing community  
267 beliefs reported during the FGDs. For instance, during the stakeholder validation meeting, a  
268 chief who was in attendance sought clarification on the means through which hydrocele is  
269 transmitted and whether it be cured.

270 “..... Here we believe that if you are passing where there are faeces of animals especially this  
271 rain season whether bush animals or village animals and it can be goats, cattle, sheep, pigs,  
272 elephants or other animals the disease goes inside the nails making your legs swollen so even  
273 if you treat hydrocele it can't be healed and that person will die at that old age with swollen  
274 legs like that....” [KII5\_ Traditional Leader].

275 Despite some healthcare providers having a basic understanding of the conditions and the  
276 correct means of providing care, a considerable proportion of those who were interviewed and  
277 who took part in the stakeholder validation meetings, acknowledged that they limited knowledge  
278 of the disease and its management. Healthcare providers who came into regular contact with  
279 patients coming to the facility or through community case identification exercises were better at  
280 identifying signs and symptoms of lymphoedema, elephantiasis and hydrocele.

### 281 **MMDP Practices and utilization of MMDP services**

282 **Health facility MMDP services.** At the health facilities, available services are general in nature  
283 without specific stand-alone activities for hydrocele and lymphedema. Not all health facilities in  
284 the area have adequate resources to conduct hydrocelectomies and referrals are usually made to  
285 either Katondwe Mission Hospital or Luangwa District Hospital. Severe cases are referred to the  
286 University teaching Hospital in Lusaka. In the case of lymphoedema, the most readily available  
287 services are pain relief and general health education with IEC materials on display in busy

288 outpatient areas. The healthcare providers expressed that they also provided antibiotics to  
289 prevent secondary infection as a result of acute attacks as well as lymphatic draining to reduce  
290 fluid density. Annual mass drug administration rounds were done to interrupt disease  
291 transmission. Despite surgical interventions being available at health facilities, utilisation was  
292 low.

293 In terms of utilization of available services, 51,1% of LF patients had sought care for their  
294 condition at the health facility before. It was common to find that patients would go to the health  
295 facility and to traditional healers. Community members pointed out that patients were more  
296 likely to go to the traditional healers because they felt as though their remedies were a more  
297 permanent solution compared to when they went to the facilities. Since once the medication  
298 prescribed at the facility ran out their symptoms would reappear. One of the traditional healers  
299 who took part in the validation meeting and had hydrocele himself, pointed out how common  
300 it was for LF patients to seek remedies from him. Slightly more than half of the lymphoedema  
301 patients (53.1%) had previously sought medical help for their condition and 71.9% who had  
302 gone to a traditional healer. Similarly, 51.0% of hydrocele patients had sought care from a  
303 medical facility and 62.5% had gone traditional healers. However, the tattoos and herbs  
304 administered by the traditional healers would exacerbate the acute attacks forcing the patients to  
305 go to the health facility.

306 The number of patients who had had surgery to reduce the swelling due to hydrocele was quite  
307 low at 14.3%. However, 58.6% of them were taking doxycycline as an alternative to surgery. Even  
308 though the service is provided for free once they get a referral, the main reasons provided for  
309 failure to have the surgeries done were insufficient money (59.2%) and unaware of services  
310 (14.1%).

311 **Home based care strategies.** The most common home-based strategies that health care facility  
312 staff advised lymphoedema patients to do were exercise, elevation, improved hygiene owing to  
313 the low economic situations that most of the patients came from, wearing baggy clothes, wound  
314 management to prevent secondary infections and pain killers just to help the patients deal with  
315 the immediate pain. Nevertheless, patients' knowledge of home-based care strategies that could  
316 prevent their lymphoedema from worsening from the patient survey was found to be low. A  
317 majority of lymphoedema patients (73.5%) had never received any information on how to  
318 manage their condition, despite more than half of them having been visited by a community-  
319 based volunteer. With regards to availability of supplies to be able to effectively manage their  
320 conditions from home, of the 22 patients with leg lymphedema only one had appropriate  
321 footwear at home. Furthermore only 15.6% had bandages and 29% had either soap or water for  
322 washing wounds. None of them had antibiotic ointments. Moreover 60% of the patients  
323 admitted to not practicing any home-based care for their condition. Whereas those who did  
324 mostly did exercises or used soap and water to clean affected areas. Community member  
325 knowledge of home-based care strategies for lymphoedema and acute attacks was also found to  
326 be low.

### 327 **Factors affecting access to MMDP services**

#### 328 **Approachability and ability to perceive need for care**

329 **Lack of awareness of existing services.** A recurring theme across the focus group discussions and  
330 the interviews is that most community members are not aware that there were MMDP services  
331 available at the health facilities or that they could be able to take preventive measures through  
332 home-based care strategies. Health talks provided by community health workers with the help of  
333 LF patients as champions are being used as an opportunity to disseminate this information.  
334 Resulting in patients who were initially hesitant about going to the health facility. Health

335 education provided during outreach activities that were conducted as part of MDA were an  
336 opportunity through which healthcare providers provided information on the diseases and more  
337 community member were open to having their households sprayed during Indoor Residual  
338 Spraying (IRS) exercises as part of prevention measures. Outside of MDA, community  
339 sensitisation exercises tend to focus on diseases such as malaria, HIV/AIDS and maternal,  
340 newborn and child related conditions as LF is not perceived to be a public health concern in the  
341 district.

342 **Belief about the disease.** Due to the communal belief that LF is hereditary with some patients  
343 having seen their parents and grandparents exhibiting symptoms and not seeking care, some  
344 patients felt that it was unnecessary to seek care. Additionally, some patients were afraid to go  
345 the health facility because they felt that their conditions had progressed to the more advanced  
346 stages and that the services they would receive would not alleviate their symptoms

347 **Misconceptions about the treatment process.** In the case of hydrocele some thought that the  
348 surgery provided would leave them in wheelchairs making it difficult for them to undertake their  
349 regular duties.

350 **Acceptability and ability to seek health care**

351 **Cultural beliefs.** Hydrocele and lymphoedema are normalised in the district. Though LF patients  
352 were considered to be in a pitiful state, FGD participants pointed out that it is common to see  
353 hydrocele patients taking part in businesses such as fish mongering and farming.

354 **Social norms.** Having hydrocele is viewed as a marker of high social standing and men who had  
355 it are more likely to be chosen as headmen as they are perceived to be old and wise. This has  
356 acted as a deterrent to patients seeking care. A key deterrent to the uptake of surgical  
357 interventions among hydrocele patients was the fear of loss of respect by their spouses. Some of  
358 the patients thought that once the procedures had been done they would be incapable of having

359 children which would make their wives not take them seriously. Some women in the  
360 communities whose husbands had hydrocele had left them due to lack of sexual satisfaction.

361 “.... When they get sick they don’t even go to the hospital because they are respected so much.  
362 Yes, they respect him a lot even if you reach somewhere he will be the first one to be given  
363 the chair just because of what they are seeing, respecting him a lot that one who doesn’t have,  
364 so mostly if you become a headman they believe you are supposed to have hydrocele and you  
365 should become the head of the family you are supposed to have that so that even if you this  
366 is our leader.....”[KII2\_ Traditional Leader].

367 **Gender.** According to the health care providers, it is more difficult to get men to come to the  
368 health facility, as compared to women and children despite hydrocele being the most common  
369 LF manifestation in the district. During the focus group discussions community members,  
370 shared the view that certain diseases, particularly to do with private parts are not meant to be  
371 shown to the opposite sex. As such hydrocele patients are embarrassed to access services and  
372 even if they do, they do not easily open up especially if they are being attended to by female  
373 health care providers. One of the suggestions given by community members on ways of  
374 increasing patients ability to seek care was having male healthcare providers handle hydrocele  
375 patients.

376 **Stigmatisation.** Fear of stigmatisation also inhibits patients’ ability to seek care. During regular  
377 case identification exercises by healthcare providers, known hydrocele patients, who are  
378 approached for referral to the health facility would either deny having the condition or request  
379 to talk to them in private because they are afraid that they would be laughed at if other  
380 community members found out that they had hydrocele. The poor health seeking habits are  
381 compounded by low levels of education among communities living in the district.

382 **Availability, accommodation and ability to reach health care**

383 **Geographic location.** Luangwa District is very remote and a portion of the district is covered by  
384 the Luangwa National Park. As a result, some communities in the district have to travel long  
385 distances of up to 20 kilometers and more to the **nearest health facility** and their access may be  
386 inhibited by wildlife attacks such as elephants from the Luangwa National Park. In addition,  
387 roads to the health facilities are sometimes impassable and the most common means of transport  
388 is bicycles which are inappropriate to transport lymphoedema and hydrocele patients. As such  
389 some patients choose to stay home rather than go to the health facility.

390 **Mobility.** In addition, the district borders Mozambique and some patients are involved in  
391 economic activities such as trade requiring them to travel. Therefore, when healthcare providers  
392 conduct outreach and follow up visits at community level to provide some MMDP services they  
393 do not find them at their homes.

394 **Adequate resources.** Procedures like hydrocelectomies require more qualified personnel like a  
395 medical doctor, who were not common in remote areas where these patients are found. A  
396 majority of the healthcare providers interviewed had not received any special training on how to  
397 handle and manage patients with hydrocele and lymphedema, except for the normal training  
398 provided during their formal training. They felt that they needed additional training to effectively  
399 provide quality care to patients. In addition, medical supplies such as diagnostic tests necessary  
400 for lymphedema and hydrocele management in most of the health facilities was inadequate.

#### 401 **Affordability and ability to pay for health care**

402 **Direct costs.** Though patients are not expected to pay for the care that they receive at the health  
403 facility, there is a perception among patients that they are still required to pay for interventions  
404 such as the hydrocele surgery which dissuades them from seeking care.

405 **Indirect costs.** In the event that during assessment a patient's case is determined to be  
406 complicated, they are referred to University Teaching Hospital in Lusaka. For most patients the



407 associated costs needed for them to obtain the care they need including hiring transportation  
408 and out of pocket hospital expenses act as barriers to accessing care. The health facility catchment  
409 areas also cover neighboring villages in Mozambique and the residents in these villages usually  
410 save over time to be able to access care.

411 “.... If maybe the family doesn’t have a bicycle and they have lymphoedema, some they have  
412 difficulties in walking so it is difficult for them to come and access the services if its not near  
413 and especially those from across the border they have to like save up money before they can  
414 come this side....” [IDI1\_ Healthcare provider].

415 **Opportunity costs.** Moreover, most of those who live in the district are poor and when deciding  
416 how best to prioritize available resources, they opt to use the minimal resources that are at their  
417 disposal for food and basic necessities first before considering spending on health care. For most  
418 of those involved in income generating activities such as fishing and trade, the opportunity cost  
419 associated with taking time off to go to a health facility is not a preferred choice. According to  
420 community members, the prevalent use of traditional healers and witchdoctors, often results in  
421 sores and secondary infections that force patients to then go to the health facility which increases  
422 the resources they spend on looking for effective treatment and management services.

423 **Appropriateness and ability to engage**

424 **Adherence to MMDP practices.** Progression of the symptoms of hydrocele and lymphoedema  
425 are dependent on proper long-term management and care. Patient motivation to maintain home  
426 based care practices is critical to ensure that lymphoedema does not progress to elephantiasis and  
427 that surgical interventions are undertaken early for hydrocele. A common sentiment expressed  
428 during the FGDs and interviews was that many lymphoedema patients lose their motivation to  
429 continue going to the facility for MMDP services which they felt was a waste of time, because  
430 despite taking up medication over a long period their conditions stayed the same. They did not

431 view the lack of progression of their symptoms to elephantiasis and fewer acute attacks as  
432 favourable treatment outcomes as they wanted their symptoms fully cured.

### 433 **Integration of MMDP services**

#### 434 **Opportunities for integration.**

435 **Use of existing community structures.** One of the main suggestions provided during the data  
436 collection and the stakeholder validation meetings was use of community-based volunteers who  
437 are rooted in the community and had been part of training for MDA, to deliver key messages  
438 relating to MMDP. The inclusion of traditional leaders and chiefs in engaging community  
439 members would help address some of the social and cultural beliefs that inhibited patients from  
440 accessing care. Some traditional leaders would act as champions.

441 **Training and capacity building.** Provision of training to different health care providers and  
442 community-based volunteers, was considered necessary in creating awareness of existing MMDP  
443 services at the facilities and different home-based care strategies. Once trained they would be  
444 better able to communicate the information to community members during outreach exercise,  
445 health talks and when doing follow up visits with patients at their homes. As well as in schools  
446 through the School health and Nutrition programme.

447 **Integration into the existing healthcare services.** Different suggestions were made by the  
448 healthcare providers on which services would be most appropriate for integration. They felt that  
449 lymphatic filariasis had some similarities with other diseases. Integrating into malaria programs  
450 was proposed due to the similarities in the mode of transmission and ease of tailoring messages  
451 around preventive and control measures. Water, Sanitation and Hygiene programmes were also  
452 proposed due to the role of proper sanitation and hygiene in the prevention of secondary  
453 infection.

## 454 **DISCUSSION**

455 Lymphatic filariasis infection if untreated results, in advanced stages of lymphoedema,  
456 elephantiasis and hydrocele which are not only debilitating but without care may result in  
457 permanent disability. Morbidity management and disability prevention services provide an  
458 opportunity through which patients could have access to management strategies that ensure their  
459 conditions do not progress to more advanced stages. Allowing them to be fully involved in  
460 community activities and undertake personal daily tasks.

461 In this study we explored perspectives towards MMDP practices within Luangwa district across  
462 a diverse range of stakeholders from patients to service providers to identify the most appropriate  
463 ways of providing care to LF patients within the existing health system in the district using  
464 Levesque et al. framework [6]. As well as identify different determinants that may affect the  
465 implementation on interventions that are aimed at providing MMDP services. We found that  
466 knowledge of the causes of disease, sign/symptoms that mark the different diseases stages and  
467 ways in which the disease can be managed through simple home-based care practices among  
468 community members was very low. It was still common to find participants in the study who  
469 thought that care practices would not have any effect on stopping disease progression. This is  
470 despite ongoing health education efforts that are conducted in the area as part of mass drug  
471 administration rounds. The negative effect of hydrocele on patients' marriages and sexual lives  
472 is similar to what has been found in other settings [10].

473 Whilst the study was able to highlight the existence of certain healthcare services—like surgery—  
474 that LF patients can access at the health facilities, it also demonstrated that access for the patients  
475 still remains a huge challenge. The low level of priority given to morbidity management and  
476 disability prevention services affects the ability of LF patients to seek appropriate care. Despite  
477 the existence of various MMDP guidelines that guide health care providers and support  
478 community and home-based care, it is common to find low knowledge levels within endemic

479 districts. Community factors such as negative traditional beliefs around certain health services  
480 like surgery play an important role with regards to shaping access and use of health services.  
481 There is a need to provide training opportunities and strengthen referral systems to ensure  
482 patients not only get appropriate care but that subsequent follow up is made possible.  
483 Furthermore, MMDP programmes should include strategies that seek to empower LF patients  
484 by ensuring that they get the required information, to access and use the services at the health  
485 facilities.

## 486 **Acknowledgements**

487 We would like to acknowledge Edson Musonda and Frank Shamilimo from the Ministry of  
488 Health who facilitated the study process. This work received financial support from the Coalition  
489 for Operational Research on Neglected Tropical Diseases (COR-NTD), which is funded at The  
490 Task Force for Global Health primarily by the Bill & Melinda Gates Foundation, by the UK aid  
491 from the British government, and by the United States Agency for International Development  
492 through its Neglected Tropical Diseases Program.

493

494 **References**

- 495 1. Kyu HH, Abate D, Abate KH, Abay SM, Abbafati C, Abbasi N, et al. Global, regional,  
496 and national disability-adjusted life-years (DALYs) for 359 diseases and injuries and healthy life  
497 expectancy (HALE) for 195 countries and territories, 1990–2017: a systematic analysis for the  
498 Global Burden of Disease Study 2017. *The Lancet*. 2018;392(10159):1859-922.
- 499 2. World Health Organisation. Global programme to eliminate lymphatic filariasis:  
500 progress report, 2018. . *The Weekly Epidemiological Record* 11th October 2019. 2019;2019,  
501 94:457-72.
- 502 3. World Health Organisation. Lymphatic filariasis: managing morbidity and preventing  
503 disability: an aide-mémoire for national programme managers. 2013.
- 504 4. Ministry of Health,Zambia. Elimination of Neglected Tropical Diseases National  
505 Masterplan 2019-2023. Lusaka, Zambia.: 2019.
- 506 5. Mwase ET, Stensgaard A-S, Nsakashalo-Senkwe M, Mubila L, Mwansa J, Songolo P, et  
507 al. Mapping the geographical distribution of lymphatic filariasis in Zambia. *PLoS neglected*  
508 *tropical diseases*. 2014;8(2):e2714.
- 509 6. Levesque J-F, Harris MF, Russell G. Patient-centred access to health care: conceptualising  
510 access at the interface of health systems and populations. *International journal for equity in*  
511 *health*. 2013;12(1):18.
- 512 7. Ritchie J, Spencer L. Qualitative data analysis for applied policy research. *Analyzing*  
513 *qualitative data*: Routledge; 2002. p. 187-208.
- 514 8. Hailemariam M, Fekadu A, Selamu M, Medhin G, Prince M, Hanlon C. Equitable access  
515 to integrated primary mental healthcare for people with severe mental disorders in Ethiopia: a  
516 formative study. *International journal for equity in health*. 2016;15(1):121.

517 9. Davy C, Harfield S, McArthur A, Munn Z, Brown A. Access to primary health care  
518 services for Indigenous peoples: A framework synthesis. *International journal for equity in*  
519 *health*. 2016;15(1):163.

520 10. Babu BV, Mishra S, Nayak AN. Marriage, sex, and hydrocele: an ethnographic study on  
521 the effect of filarial hydrocele on conjugal life and marriageability from Orissa, India. *PLoS*  
522 *neglected tropical diseases*. 2009;3(4):e414.

523
